# Supplementary material
Source: PubMed Central journal article supplement (PMC5460802)
Supplement: en.2016-1875.sf1.pdf [file en.2016-1875.sf1.pdf]

**Supplementary Fig. S2.** High resolution maps for loci on chromosomes 17 significantly linked to TgAb (panel A) and thyroiditis (panel B) in N2 mice to show the origin of the gene segments within the Bayes confidence interval:- dark grey, the MHC Locus (31.7-39.3 Mb) from the B10.A(4R) strain; light grey, non-MHC genes from the B10.A(4R) strain; pale blue, genes from the NOD strain.

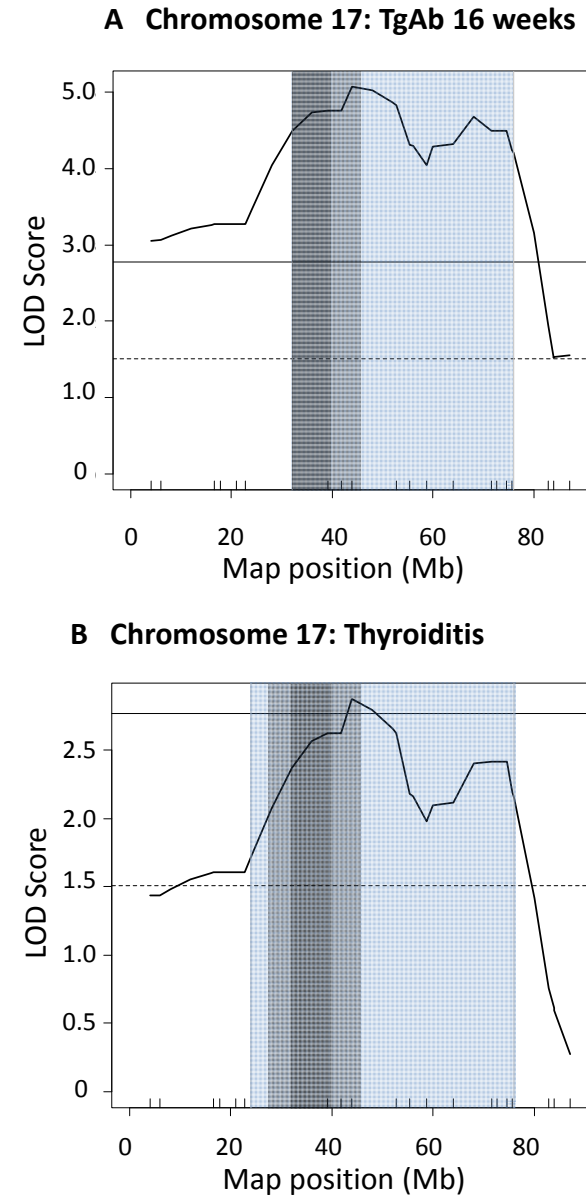

**Supplementary Table S1: Chromosome 17: 32,081,714-75,936,246 Mb.**

Immune related biological process (BP) Gene Ontology (GO) terms in red. All protein coding genes

| Ensembl Gene ID           | Description                                                                                | Gene Start (bp) | Gene End (bp) | Assc Name      |
|---------------------------|--------------------------------------------------------------------------------------------|-----------------|---------------|----------------|
| <b>ENSMUSG0000002076</b>  | <b>heat shock transcription factor 2 binding protein [Source:MGI Symbol;Acc:MGI:19216]</b> | <b>3.2E+07</b>  | <b>3E+07</b>  | <b>Hsf2bp</b>  |
| ENSMUSG00000058392        | ribosomal RNA processing 1 homolog B (S. cerevisiae) [Source:MGI Symbol;Acc:MGI:1919]      | 3.2E+07         | 3E+07         | Rrp1b          |
| ENSMUSG00000038146        | Notch gene homolog 3 (Drosophila) [Source:MGI Symbol;Acc:MGI:99460]                        | 3.2E+07         | 3E+07         | Notch3         |
| ENSMUSG00000037577        | epoxide hydrolase 3 [Source:MGI Symbol;Acc:MGI:1919182]                                    | 3.2E+07         | 3E+07         | Ephx3          |
| ENSMUSG00000024002        | bromodomain containing 4 [Source:MGI Symbol;Acc:MGI:1888520]                               | 3.2E+07         | 3E+07         | Brd4           |
| <b>ENSMUSG00000024045</b> | <b>A kinase (PRKA) anchor protein 8 [Source:MGI Symbol;Acc:MGI:1928488]</b>                | <b>3.2E+07</b>  | <b>3E+07</b>  | <b>Akap8</b>   |
| ENSMUSG00000002625        | A kinase (PRKA) anchor protein 8-like [Source:MGI Symbol;Acc:MGI:1860606]                  | 3.2E+07         | 3E+07         | Akap8l         |
| ENSMUSG00000024050        | widely-interspaced zinc finger motifs [Source:MGI Symbol;Acc:MGI:1332638]                  | 3.2E+07         | 3E+07         | Wiz            |
| <b>ENSMUSG00000052142</b> | <b>RAS protein activator like 3 [Source:MGI Symbol;Acc:MGI:2444128]</b>                    | <b>3.3E+07</b>  | <b>3E+07</b>  | <b>Rasal3</b>  |
| ENSMUSG00000053467        | RIKEN cDNA A530088E08 gene [Source:MGI Symbol;Acc:MGI:3603459]                             | 3.3E+07         | 3E+07         | A530088E08Rik  |
| <b>ENSMUSG00000079563</b> | <b>peptidoglycan recognition protein 2 [Source:MGI Symbol;Acc:MGI:1928099]</b>             | <b>3.3E+07</b>  | <b>3E+07</b>  | <b>Pglyrp2</b> |
| ENSMUSG00000061126        | cytochrome P450, family 4, subfamily f, polypeptide 39 [Source:MGI Symbol;Acc:MGI:2445]    | 3.3E+07         | 3E+07         | Cyp4f39        |
| ENSMUSG00000091586        | cytochrome P450, family 4, subfamily f, polypeptide 17 [Source:MGI Symbol;Acc:MGI:3646]    | 3.3E+07         | 3E+07         | Cyp4f17        |
| ENSMUSG00000048440        | cytochrome P450, family 4, subfamily f, polypeptide 16 [Source:MGI Symbol;Acc:MGI:1917]    | 3.3E+07         | 3E+07         | Cyp4f16        |
| ENSMUSG00000062464        | predicted gene 9705 [Source:MGI Symbol;Acc:MGI:3780112]                                    | 3.3E+07         | 3E+07         | Gm9705         |
| ENSMUSG00000090700        | cytochrome P450, family 4, subfamily f, polypeptide 40 [Source:MGI Symbol;Acc:MGI:3645]    | 3.3E+07         | 3E+07         | Cyp4f40        |
| ENSMUSG00000073424        | cytochrome P450, family 4, subfamily f, polypeptide 15 [Source:MGI Symbol;Acc:MGI:2146]    | 3.3E+07         | 3E+07         | Cyp4f15        |
| ENSMUSG00000024298        | zinc finger protein 871 [Source:MGI Symbol;Acc:MGI:1921793]                                | 3.3E+07         | 3E+07         | Zfp871         |
| ENSMUSG00000055202        | zinc finger protein 811 [Source:MGI Symbol;Acc:MGI:2682944]                                | 3.3E+07         | 3E+07         | Zfp811         |
| ENSMUSG00000059000        | zinc finger protein 799 [Source:MGI Symbol;Acc:MGI:2443934]                                | 3.3E+07         | 3E+07         | Zfp799         |
| ENSMUSG00000057254        | zinc finger protein 870 [Source:MGI Symbol;Acc:MGI:3029586]                                | 3.3E+07         | 3E+07         | Zfp870         |
| ENSMUSG00000024292        | cytochrome P450, family 4, subfamily f, polypeptide 14 [Source:MGI Symbol;Acc:MGI:1927]    | 3.3E+07         | 3E+07         | Cyp4f14        |
| ENSMUSG00000024055        | cytochrome P450, family 4, subfamily f, polypeptide 13 [Source:MGI Symbol;Acc:MGI:2158]    | 3.3E+07         | 3E+07         | Cyp4f13        |
| ENSMUSG00000053600        | zinc finger protein 472 [Source:MGI Symbol;Acc:MGI:2385049]                                | 3.3E+07         | 3E+07         | Zfp472         |
| ENSMUSG00000053390        | zinc finger protein 952 [Source:MGI Symbol;Acc:MGI:2441928]                                | 3.3E+07         | 3E+07         | Zfp952         |
| ENSMUSG00000067430        | zinc finger protein 763 [Source:MGI Symbol;Acc:MGI:1920701]                                | 3.3E+07         | 3E+07         | Zfp763         |
| ENSMUSG00000023350        | RIKEN cDNA 4921501E09 gene [Source:MGI Symbol;Acc:MGI:1921292]                             | 3.3E+07         | 3E+07         | 4921501E09Rik  |
| ENSMUSG00000067424        | zinc finger protein 563 [Source:MGI Symbol;Acc:MGI:2677168]                                | 3.3E+07         | 3E+07         | Zfp563         |
| ENSMUSG00000048602        | microrchidia 2B [Source:MGI Symbol;Acc:MGI:3045293]                                        | 3.3E+07         | 3E+07         | Morc2b         |
| ENSMUSG00000079309        | olfactory receptor 55 [Source:MGI Symbol;Acc:MGI:1333751]                                  | 3.3E+07         | 3E+07         | Olf55          |
| ENSMUSG00000079308        | olfactory receptor 239 [Source:MGI Symbol;Acc:MGI:3030073]                                 | 3.3E+07         | 3E+07         | Olf239         |
| ENSMUSG00000079307        | predicted gene 4461 [Source:MGI Symbol;Acc:MGI:3782645]                                    | 3.3E+07         | 3E+07         | Gm4461         |
| ENSMUSG00000008686        | zinc finger protein 955A [Source:MGI Symbol;Acc:MGI:4834570]                               | 3.3E+07         | 3E+07         | Zfp955a        |
| ENSMUSG00000054666        | olfactory receptor 63 [Source:MGI Symbol;Acc:MGI:1335096]                                  | 3.3E+07         | 3E+07         | Olf63          |
| ENSMUSG00000061532        | zinc finger protein 955B [Source:MGI Symbol;Acc:MGI:4834573]                               | 3.3E+07         | 3E+07         | Zfp955b        |

|                            |                                                                                               |                |              |                |
|----------------------------|-----------------------------------------------------------------------------------------------|----------------|--------------|----------------|
| ENSMUSG00000091515         | zinc finger protein 422, related sequence 1 [Source:MGI Symbol;Acc:MGI:3028594]               | 3.3E+07        | 3E+07        | Zfp422-rs1     |
| ENSMUSG00000003929         | zinc finger protein 81 [Source:MGI Symbol;Acc:MGI:1890752]                                    | 3.3E+07        | 3E+07        | Zfp81          |
| ENSMUSG000000055240        | zinc finger protein 101 [Source:MGI Symbol;Acc:MGI:107547]                                    | 3.3E+07        | 3E+07        | Zfp101         |
| ENSMUSG000000092519        | actin-like 9 [Source:MGI Symbol;Acc:MGI:1916731]                                              | 3.4E+07        | 3E+07        | Actl9          |
| ENSMUSG000000024299        | a disintegrin-like and metallopeptidase (reprolysin type) with thrombospondin type 1 motif, 1 | 3.4E+07        | 3E+07        | Adamts10       |
| <b>ENSMUSG00000024300</b>  | <b>myosin IF [Source:MGI Symbol;Acc:MGI:107711]</b>                                           | <b>3.4E+07</b> | <b>3E+07</b> | <b>Myo1f</b>   |
| ENSMUSG000000073423        | zinc finger protein 414 [Source:MGI Symbol;Acc:MGI:1915641]                                   | 3.4E+07        | 3E+07        | Zfp414         |
| <b>ENSMUSG00000032739</b>  | <b>PML-RAR alpha-regulated adaptor molecule 1 [Source:MGI Symbol;Acc:MGI:3576625]</b>         | <b>3.4E+07</b> | <b>3E+07</b> | <b>Pram1</b>   |
| ENSMUSG000000059208        | heterogeneous nuclear ribonucleoprotein M [Source:MGI Symbol;Acc:MGI:1926465]                 | 3.4E+07        | 3E+07        | Hnrnpm         |
| ENSMUSG000000079557        | membrane-associated ring finger (C3HC4) 2 [Source:MGI Symbol;Acc:MGI:1925915]                 | 3.4E+07        | 3E+07        | March2         |
| ENSMUSG000000077450        | RAB11B, member RAS oncogene family [Source:MGI Symbol;Acc:MGI:99425]                          | 3.4E+07        | 3E+07        | Rab11b         |
| ENSMUSG000000002289        | angiopoietin-like 4 [Source:MGI Symbol;Acc:MGI:1888999]                                       | 3.4E+07        | 3E+07        | Angptl4        |
| ENSMUSG000000042099        | KN motif and ankyrin repeat domains 3 [Source:MGI Symbol;Acc:MGI:1098615]                     | 3.4E+07        | 3E+07        | Kank3          |
| ENSMUSG000000067288        | ribosomal protein S28 [Source:MGI Symbol;Acc:MGI:1859516]                                     | 3.4E+07        | 3E+07        | Rps28          |
| ENSMUSG000000041881        | NADH dehydrogenase (ubiquinone) 1 alpha subcomplex, 7 (B14.5a) [Source:MGI Symbol;A           | 3.4E+07        | 3E+07        | Ndufa7         |
| ENSMUSG000000002308        | CD320 antigen [Source:MGI Symbol;Acc:MGI:1860083]                                             | 3.4E+07        | 3E+07        | Cd320          |
| ENSMUSG000000079553        | kinesin family member C1 [Source:MGI Symbol;Acc:MGI:109596]                                   | 3.4E+07        | 3E+07        | Kifc1          |
| ENSMUSG000000002307        | Fas death domain-associated protein [Source:MGI Symbol;Acc:MGI:1197015]                       | 3.4E+07        | 3E+07        | Daxx           |
| <b>ENSMUSG00000024308</b>  | <b>TAP binding protein [Source:MGI Symbol;Acc:MGI:1201689]</b>                                | <b>3.4E+07</b> | <b>3E+07</b> | <b>Tapbp</b>   |
| ENSMUSG000000051390        | zinc finger and BTB domain containing 22 [Source:MGI Symbol;Acc:MGI:1931870]                  | 3.4E+07        | 3E+07        | Zbtb22         |
| ENSMUSG000000041354        | ral guanine nucleotide dissociation stimulator-like 2 [Source:MGI Symbol;Acc:MGI:107483]      | 3.4E+07        | 3E+07        | Rgl2           |
| <b>ENSMUSG00000024309</b>  | <b>H2-K region expressed gene 2 [Source:MGI Symbol;Acc:MGI:95908]</b>                         | <b>3.4E+07</b> | <b>3E+07</b> | <b>H2-Ke2</b>  |
| ENSMUSG000000024312        | WD repeat domain 46 [Source:MGI Symbol;Acc:MGI:1931871]                                       | 3.4E+07        | 3E+07        | Wdr46          |
| ENSMUSG000000067370        | UDP-Gal:betaGlcNAc beta 1,3-galactosyltransferase, polypeptide 4 [Source:MGI Symbol;A         | 3.4E+07        | 3E+07        | B3galt4        |
| ENSMUSG000000008668        | ribosomal protein S18 [Source:MGI Symbol;Acc:MGI:98146]                                       | 3.4E+07        | 3E+07        | Rps18          |
| ENSMUSG000000024319        | vacuolar protein sorting 52 (yeast) [Source:MGI Symbol;Acc:MGI:1330304]                       | 3.4E+07        | 3E+07        | Vps52          |
| <b>ENSMUSG000000061232</b> | <b>histocompatibility 2, K1, K region [Source:MGI Symbol;Acc:MGI:95904]</b>                   | <b>3.4E+07</b> | <b>3E+07</b> | <b>H2-K1</b>   |
| ENSMUSG000000024325        | ring finger protein 1 [Source:MGI Symbol;Acc:MGI:1101770]                                     | 3.4E+07        | 3E+07        | Ring1          |
| <b>ENSMUSG000000073422</b> | <b>H2-K region expressed gene 6 [Source:MGI Symbol;Acc:MGI:95911]</b>                         | <b>3.4E+07</b> | <b>3E+07</b> | <b>H2-Ke6</b>  |
| ENSMUSG000000024327        | solute carrier family 39 (zinc transporter), member 7 [Source:MGI Symbol;Acc:MGI:95909]       | 3.4E+07        | 3E+07        | Slc39a7        |
| ENSMUSG000000039656        | retinoid X receptor beta [Source:MGI Symbol;Acc:MGI:98215]                                    | 3.4E+07        | 3E+07        | Rxrb           |
| ENSMUSG000000024330        | collagen, type XI, alpha 2 [Source:MGI Symbol;Acc:MGI:88447]                                  | 3.4E+07        | 3E+07        | Col11a2        |
| <b>ENSMUSG00000024334</b>  | <b>histocompatibility 2, O region alpha locus [Source:MGI Symbol;Acc:MGI:95924]</b>           | <b>3.4E+07</b> | <b>3E+07</b> | <b>H2-Oa</b>   |
| ENSMUSG000000024335        | bromodomain containing 2 [Source:MGI Symbol;Acc:MGI:99495]                                    | 3.4E+07        | 3E+07        | Brd2           |
| <b>ENSMUSG00000037649</b>  | <b>histocompatibility 2, class II, locus DMa [Source:MGI Symbol;Acc:MGI:95921]</b>            | <b>3.4E+07</b> | <b>3E+07</b> | <b>H2-DMa</b>  |
| <b>ENSMUSG00000037548</b>  | <b>histocompatibility 2, class II, locus Mb2 [Source:MGI Symbol;Acc:MGI:95923]</b>            | <b>3.4E+07</b> | <b>3E+07</b> | <b>H2-DMb2</b> |
| <b>ENSMUSG000000079547</b> | <b>histocompatibility 2, class II, locus Mb1 [Source:MGI Symbol;Acc:MGI:95922]</b>            | <b>3.4E+07</b> | <b>3E+07</b> | <b>H2-DMb1</b> |
| <b>ENSMUSG00000024337</b>  | <b>proteasome (prosome, macropain) subunit, beta type 9 (large multifunctional peptida</b>    | <b>3.4E+07</b> | <b>3E+07</b> | <b>Psmb9</b>   |
| <b>ENSMUSG000000037321</b> | <b>transporter 1, ATP-binding cassette, sub-family B (MDR/TAP) [Source:MGI Symbol;A</b>       | <b>3.4E+07</b> | <b>3E+07</b> | <b>Tap1</b>    |
| <b>ENSMUSG00000024338</b>  | <b>proteasome (prosome, macropain) subunit, beta type 8 (large multifunctional peptida</b>    | <b>3.4E+07</b> | <b>3E+07</b> | <b>Psmb8</b>   |

|                           |                                                                                                                                   |                |              |               |
|---------------------------|-----------------------------------------------------------------------------------------------------------------------------------|----------------|--------------|---------------|
| ENSMUSG00000092550        | predicted gene 20496 [Source:MGI Symbol;Acc:MGI:5141961]                                                                          | 3.4E+07        | 3E+07        | Gm20496       |
| <b>ENSMUSG00000024339</b> | <b>transporter 2, ATP-binding cassette, sub-family B (MDR/TAP) [Source:MGI Symbol;Acc:MGI:5141961]</b>                            | <b>3.4E+07</b> | <b>3E+07</b> | <b>Tap2</b>   |
| ENSMUSG00000081512        | predicted gene 15821 [Source:MGI Symbol;Acc:MGI:3801940]                                                                          | 3.4E+07        | 3E+07        | Gm15821       |
| <b>ENSMUSG00000041538</b> | <b>histocompatibility 2, O region beta locus [Source:MGI Symbol;Acc:MGI:95925]</b>                                                | <b>3.4E+07</b> | <b>3E+07</b> | <b>H2-Ob</b>  |
| <b>ENSMUSG00000073421</b> | <b>histocompatibility 2, class II antigen A, beta 1 [Source:MGI Symbol;Acc:MGI:103070]</b>                                        | <b>3.4E+07</b> | <b>3E+07</b> | <b>H2-Ab1</b> |
| <b>ENSMUSG00000036594</b> | <b>histocompatibility 2, class II antigen A, alpha [Source:MGI Symbol;Acc:MGI:95895]</b>                                          | <b>3.4E+07</b> | <b>3E+07</b> | <b>H2-Aa</b>  |
| <b>ENSMUSG00000060586</b> | <b>histocompatibility 2, class II antigen E beta [Source:MGI Symbol;Acc:MGI:95901]</b>                                            | <b>3.4E+07</b> | <b>3E+07</b> | <b>H2-Eb1</b> |
| <b>ENSMUSG00000067341</b> | <b>histocompatibility 2, class II antigen E beta2 [Source:MGI Symbol;Acc:MGI:95902]</b>                                           | <b>3.4E+07</b> | <b>3E+07</b> | <b>H2-Eb2</b> |
| ENSMUSG00000079538        | predicted gene 11140 [Source:MGI Symbol;Acc:MGI:3779395]                                                                          | 3.4E+07        | 3E+07        | Gm11140       |
| <b>ENSMUSG00000024340</b> | <b>butyrophilin-like 2 [Source:MGI Symbol;Acc:MGI:1859549]</b>                                                                    | <b>3.4E+07</b> | <b>3E+07</b> | <b>Btnl2</b>  |
| ENSMUSG00000062638        | butyrophilin-like 1 [Source:MGI Symbol;Acc:MGI:1932027]                                                                           | 3.5E+07        | 3E+07        | Btnl1         |
| ENSMUSG00000057246        | cDNA sequence BC051142 [Source:MGI Symbol;Acc:MGI:3039565]                                                                        | 3.5E+07        | 3E+07        | BC051142      |
| ENSMUSG00000058435        | butyrophilin-like 4 [Source:MGI Symbol;Acc:MGI:1932036]                                                                           | 3.5E+07        | 3E+07        | Btnl4         |
| ENSMUSG00000058762        | butyrophilin-like 6 [Source:MGI Symbol;Acc:MGI:1932038]                                                                           | 3.5E+07        | 3E+07        | Btnl6         |
| ENSMUSG00000061728        | butyrophilin-like 7 [Source:MGI Symbol;Acc:MGI:2388054]                                                                           | 3.5E+07        | 3E+07        | Btnl7         |
| ENSMUSG00000015468        | Notch gene homolog 4 (Drosophila) [Source:MGI Symbol;Acc:MGI:107471]                                                              | 3.5E+07        | 3E+07        | Notch4        |
| <b>ENSMUSG00000034786</b> | <b>G-protein signalling modulator 3 (AGS3-like, C. elegans) [Source:MGI Symbol;Acc:MGI:107471]</b>                                | <b>3.5E+07</b> | <b>3E+07</b> | <b>Gpsm3</b>  |
| ENSMUSG00000034673        | pre B cell leukemia homeobox 2 [Source:MGI Symbol;Acc:MGI:1341793]                                                                | 3.5E+07        | 3E+07        | Pbx2          |
| <b>ENSMUSG00000015452</b> | <b>advanced glycosylation end product-specific receptor [Source:MGI Symbol;Acc:MGI:1341793]</b>                                   | <b>3.5E+07</b> | <b>3E+07</b> | <b>Ager</b>   |
| ENSMUSG00000015478        | ring finger protein 5 [Source:MGI Symbol;Acc:MGI:1860076]                                                                         | 3.5E+07        | 3E+07        | Rnf5          |
| ENSMUSG00000034254        | 1-acylglycerol-3-phosphate O-acyltransferase 1 (lysophosphatidic acid acyltransferase, alpha) [Source:MGI Symbol;Acc:MGI:1860076] | 3.5E+07        | 3E+07        | Agpat1        |
| ENSMUSG00000015467        | EGF-like domain 8 [Source:MGI Symbol;Acc:MGI:1932094]                                                                             | 3.5E+07        | 3E+07        | Egfl8         |
| ENSMUSG00000015474        | palmitoyl-protein thioesterase 2 [Source:MGI Symbol;Acc:MGI:1860075]                                                              | 3.5E+07        | 3E+07        | Ppt2          |
| ENSMUSG00000015476        | proline-rich transmembrane protein 1 [Source:MGI Symbol;Acc:MGI:1932118]                                                          | 3.5E+07        | 3E+07        | Prrt1         |
| ENSMUSG00000033739        | FK506 binding protein-like [Source:MGI Symbol;Acc:MGI:1932127]                                                                    | 3.5E+07        | 3E+07        | Fkbp1         |
| ENSMUSG00000015461        | activating transcription factor 6 beta [Source:MGI Symbol;Acc:MGI:105121]                                                         | 3.5E+07        | 3E+07        | Atf6b         |
| ENSMUSG00000033327        | tenascin XB [Source:MGI Symbol;Acc:MGI:1932137]                                                                                   | 3.5E+07        | 3E+07        | Tnxb          |
| <b>ENSMUSG00000073418</b> | <b>complement component 4B (Chido blood group) [Source:MGI Symbol;Acc:MGI:88226]</b>                                              | <b>3.5E+07</b> | <b>3E+07</b> | <b>C4b</b>    |
| ENSMUSG00000024365        | cytochrome P450, family 21, subfamily a, polypeptide 1 [Source:MGI Symbol;Acc:MGI:88226]                                          | 3.5E+07        | 3E+07        | Cyp21a1       |
| ENSMUSG00000061207        | serine/threonine kinase 19 [Source:MGI Symbol;Acc:MGI:1860085]                                                                    | 3.5E+07        | 3E+07        | Stk19         |
| ENSMUSG00000040482        | DOM-3 homolog Z (C. elegans) [Source:MGI Symbol;Acc:MGI:1890444]                                                                  | 3.5E+07        | 3E+07        | Dom3z         |
| ENSMUSG00000040356        | superkiller viralicidic activity 2-like (S. cerevisiae) [Source:MGI Symbol;Acc:MGI:1099835]                                       | 3.5E+07        | 3E+07        | Skiv2l        |
| ENSMUSG00000024369        | RD RNA-binding protein [Source:MGI Symbol;Acc:MGI:102744]                                                                         | 3.5E+07        | 3E+07        | Rdbp          |
| <b>ENSMUSG00000090231</b> | <b>complement factor B [Source:MGI Symbol;Acc:MGI:105975]</b>                                                                     | <b>3.5E+07</b> | <b>3E+07</b> | <b>Cfb</b>    |
| <b>ENSMUSG00000024371</b> | <b>complement component 2 (within H-2S) [Source:MGI Symbol;Acc:MGI:88226]</b>                                                     | <b>3.5E+07</b> | <b>4E+07</b> | <b>C2</b>     |
| ENSMUSG00000092511        | predicted gene 20547 [Source:MGI Symbol;Acc:MGI:5142012]                                                                          | 3.5E+07        | 4E+07        | Gm20547       |
| ENSMUSG00000093620        | complement factor B isoform 2 precursor [Source:RefSeq peptide;Acc:NP_001136178]                                                  | 3.5E+07        | 3E+07        | CT025759.1    |
| ENSMUSG00000049823        | zinc finger and BTB domain containing 12 [Source:MGI Symbol;Acc:MGI:88133]                                                        | 3.5E+07        | 4E+07        | Zbtb12        |
| ENSMUSG00000013787        | euchromatic histone lysine N-methyltransferase 2 [Source:MGI Symbol;Acc:MGI:2148922]                                              | 3.5E+07        | 4E+07        | Ehmt2         |
| ENSMUSG00000007034        | solute carrier family 44, member 4 [Source:MGI Symbol;Acc:MGI:1917379]                                                            | 3.5E+07        | 4E+07        | Slc44a4       |

|                           |                                                                                                |                |              |                 |
|---------------------------|------------------------------------------------------------------------------------------------|----------------|--------------|-----------------|
| ENSMUSG00000007038        | neuraminidase 1 [Source:MGI Symbol;Acc:MGI:97305]                                              | 3.5E+07        | 4E+07        | Neu1            |
| ENSMUSG00000090877        | heat shock protein 1B [Source:MGI Symbol;Acc:MGI:99517]                                        | 3.5E+07        | 4E+07        | Hspa1b          |
| ENSMUSG00000091971        | heat shock protein 1A [Source:MGI Symbol;Acc:MGI:96244]                                        | 3.5E+07        | 4E+07        | Hspa1a          |
| ENSMUSG00000092609        | predicted gene 20481 [Source:MGI Symbol;Acc:MGI:5141946]                                       | 3.5E+07        | 4E+07        | Gm20481         |
| ENSMUSG00000007033        | heat shock protein 1-like [Source:MGI Symbol;Acc:MGI:96231]                                    | 3.5E+07        | 4E+07        | Hspa1l          |
| ENSMUSG00000007050        | LSM2 homolog, U6 small nuclear RNA associated (S. cerevisiae) [Source:MGI Symbol;Acc:          | 3.5E+07        | 4E+07        | Lsm2            |
| ENSMUSG00000091747        | DNA segment, Chr 17, human D6S56E 5 [Source:MGI Symbol;Acc:MGI:1306799]                        | 3.5E+07        | 4E+07        | D17H6S56E-5     |
| ENSMUSG00000007029        | valyl-tRNA synthetase [Source:MGI Symbol;Acc:MGI:90675]                                        | 3.5E+07        | 4E+07        | Vars            |
| ENSMUSG00000007030        | DNA segment, Chr 17, human D6S56E 3 [Source:MGI Symbol;Acc:MGI:1306798]                        | 3.5E+07        | 4E+07        | D17H6S56E-3     |
| ENSMUSG00000036185        | Ng23 protein [Source:MGI Symbol;Acc:MGI:2388100]                                               | 3.5E+07        | 4E+07        | Ng23            |
| ENSMUSG00000007035        | mutS homolog 5 (E. coli) [Source:MGI Symbol;Acc:MGI:1329021]                                   | 3.5E+07        | 4E+07        | Msh5            |
| ENSMUSG00000007041        | chloride intracellular channel 1 [Source:MGI Symbol;Acc:MGI:2148924]                           | 3.5E+07        | 4E+07        | Clic1           |
| ENSMUSG00000007039        | dimethylarginine dimethylaminohydrolase 2 [Source:MGI Symbol;Acc:MGI:1859016]                  | 3.5E+07        | 4E+07        | Ddah2           |
| <b>ENSMUSG00000073414</b> | <b>expressed sequence AU023871 [Source:MGI Symbol;Acc:MGI:2146995]</b>                         | <b>3.5E+07</b> | <b>4E+07</b> | <b>AU023871</b> |
| ENSMUSG00000007044        | lymphocyte antigen 6 complex, locus G6C [Source:MGI Symbol;Acc:MGI:2148930]                    | 3.5E+07        | 4E+07        | Ly6g6c          |
| ENSMUSG00000073413        | lymphocyte antigen 6 complex, locus G6D [Source:MGI Symbol;Acc:MGI:2148931]                    | 3.5E+07        | 4E+07        | Ly6g6d          |
| ENSMUSG00000013766        | lymphocyte antigen 6 complex, locus G6E [Source:MGI Symbol;Acc:MGI:1917524]                    | 3.5E+07        | 4E+07        | Ly6g6e          |
| ENSMUSG00000034923        | lymphocyte antigen 6 complex, locus G6F [Source:MGI Symbol;Acc:MGI:3616082]                    | 3.5E+07        | 4E+07        | Ly6g6f          |
| ENSMUSG00000007036        | abhydrolase domain containing 16A [Source:MGI Symbol;Acc:MGI:99476]                            | 3.5E+07        | 4E+07        | Abhd16a         |
| ENSMUSG00000034482        | lymphocyte antigen 6 complex, locus G5C [Source:MGI Symbol;Acc:MGI:2148974]                    | 3.5E+07        | 4E+07        | Ly6g5c          |
| ENSMUSG00000043807        | lymphocyte antigen 6 complex, locus G5B [Source:MGI Symbol;Acc:MGI:2385809]                    | 3.5E+07        | 4E+07        | Ly6g5b          |
| ENSMUSG00000024387        | casein kinase 2, beta polypeptide [Source:MGI Symbol;Acc:MGI:88548]                            | 3.5E+07        | 4E+07        | Csnk2b          |
| ENSMUSG00000092417        | G patch domain and ankyrin repeats 1 [Source:MGI Symbol;Acc:MGI:2148975]                       | 3.5E+07        | 4E+07        | Gpank1          |
| ENSMUSG00000043311        | DNA segment, Chr 17, human D6S53E [Source:MGI Symbol;Acc:MGI:90673]                            | 3.5E+07        | 4E+07        | D17H6S53E       |
| ENSMUSG00000024391        | apolipoprotein M [Source:MGI Symbol;Acc:MGI:1930124]                                           | 3.5E+07        | 4E+07        | Apom            |
| <b>ENSMUSG00000024392</b> | <b>BCL2-associated athanogene 6 [Source:MGI Symbol;Acc:MGI:1919439]</b>                        | <b>3.5E+07</b> | <b>4E+07</b> | <b>Bag6</b>     |
| ENSMUSG00000024393        | proline-rich coiled-coil 2A [Source:MGI Symbol;Acc:MGI:1915467]                                | 3.5E+07        | 4E+07        | Prrc2a          |
| <b>ENSMUSG00000024397</b> | <b>allograft inflammatory factor 1 [Source:MGI Symbol;Acc:MGI:1343098]</b>                     | <b>3.5E+07</b> | <b>4E+07</b> | <b>Aif1</b>     |
| <b>ENSMUSG00000073412</b> | <b>leukocyte specific transcript 1 [Source:MGI Symbol;Acc:MGI:1096324]</b>                     | <b>3.5E+07</b> | <b>4E+07</b> | <b>Lst1</b>     |
| <b>ENSMUSG00000024399</b> | <b>lymphotoxin B [Source:MGI Symbol;Acc:MGI:104796]</b>                                        | <b>3.5E+07</b> | <b>4E+07</b> | <b>Ltb</b>      |
| <b>ENSMUSG00000024401</b> | <b>tumor necrosis factor [Source:MGI Symbol;Acc:MGI:104798]</b>                                | <b>3.5E+07</b> | <b>4E+07</b> | <b>Tnf</b>      |
| <b>ENSMUSG00000024402</b> | <b>lymphotoxin A [Source:MGI Symbol;Acc:MGI:104797]</b>                                        | <b>3.5E+07</b> | <b>4E+07</b> | <b>Lta</b>      |
| <b>ENSMUSG00000042419</b> | <b>nuclear factor of kappa light polypeptide gene enhancer in B cells inhibitor like 1 [So</b> | <b>3.5E+07</b> | <b>4E+07</b> | <b>Nfkbil1</b>  |
| ENSMUSG00000081650        | predicted gene 16181 [Source:MGI Symbol;Acc:MGI:3802038]                                       | 3.5E+07        | 4E+07        | Gm16181         |
| ENSMUSG00000024403        | ATPase, H+ transporting, lysosomal V1 subunit G2 [Source:MGI Symbol;Acc:MGI:1913487]           | 3.5E+07        | 4E+07        | Atp6v1g2        |
| ENSMUSG00000019432        | DEAD (Asp-Glu-Ala-Asp) box polypeptide 39B [Source:MGI Symbol;Acc:MGI:99240]                   | 3.5E+07        | 4E+07        | Ddx39b          |
| <b>ENSMUSG00000073411</b> | <b>histocompatibility 2, D region locus 1 [Source:MGI Symbol;Acc:MGI:95896]</b>                | <b>3.5E+07</b> | <b>4E+07</b> | <b>H2-D1</b>    |
| <b>ENSMUSG00000079507</b> | <b>histocompatibility 2, Q region locus 1 [Source:MGI Symbol;Acc:MGI:95928]</b>                | <b>3.5E+07</b> | <b>4E+07</b> | <b>H2-Q1</b>    |
| <b>ENSMUSG00000091705</b> | <b>histocompatibility 2, Q region locus 2 [Source:MGI Symbol;Acc:MGI:95931]</b>                | <b>3.5E+07</b> | <b>4E+07</b> | <b>H2-Q2</b>    |
| <b>ENSMUSG00000035929</b> | <b>histocompatibility 2, Q region locus 4 [Source:MGI Symbol;Acc:MGI:95933]</b>                | <b>3.6E+07</b> | <b>4E+07</b> | <b>H2-Q4</b>    |

|                           |                                                                                        |                |              |                |
|---------------------------|----------------------------------------------------------------------------------------|----------------|--------------|----------------|
| <b>ENSMUSG00000073409</b> | <b>histocompatibility 2, Q region locus 6 [Source:MGI Symbol;Acc:MGI:95935]</b>        | <b>3.6E+07</b> | <b>4E+07</b> | <b>H2-Q6</b>   |
| <b>ENSMUSG00000060550</b> | <b>histocompatibility 2, Q region locus 7 [Source:MGI Symbol;Acc:MGI:95936]</b>        | <b>3.6E+07</b> | <b>4E+07</b> | <b>H2-Q7</b>   |
| <b>ENSMUSG00000067235</b> | <b>histocompatibility 2, Q region locus 10 [Source:MGI Symbol;Acc:MGI:95929]</b>       | <b>3.6E+07</b> | <b>4E+07</b> | <b>H2-Q10</b>  |
| ENSMUSG00000024406        | POU domain, class 5, transcription factor 1 [Source:MGI Symbol;Acc:MGI:101893]         | 3.6E+07        | 4E+07        | Pou5f1         |
| ENSMUSG00000050410        | transcription factor 19 [Source:MGI Symbol;Acc:MGI:103180]                             | 3.6E+07        | 4E+07        | Tcf19          |
| ENSMUSG00000040312        | coiled-coil alpha-helical rod protein 1 [Source:MGI Symbol;Acc:MGI:2385321]            | 3.6E+07        | 4E+07        | Cchcr1         |
| ENSMUSG00000024409        | psoriasis susceptibility 1 candidate 2 (human) [Source:MGI Symbol;Acc:MGI:1930025]     | 3.6E+07        | 4E+07        | Psors1c2       |
| ENSMUSG00000039518        | corneodesmosin [Source:MGI Symbol;Acc:MGI:3505689]                                     | 3.6E+07        | 4E+07        | Cdsn           |
| ENSMUSG00000039269        | RIKEN cDNA 2300002M23 gene [Source:MGI Symbol;Acc:MGI:1916792]                         | 3.6E+07        | 4E+07        | 2300002M23Rik  |
| ENSMUSG00000090509        | surfactant associated 2 [Source:MGI Symbol;Acc:MGI:3643293]                            | 3.6E+07        | 4E+07        | Sfta2          |
| ENSMUSG00000090588        | predicted gene 9573 [Source:MGI Symbol;Acc:MGI:3779983]                                | 3.6E+07        | 4E+07        | Gm9573         |
| ENSMUSG00000073408        | diffuse panbronchiolitis critical region 1 (human) [Source:MGI Symbol;Acc:MGI:2685476] | 3.6E+07        | 4E+07        | Dpcr1          |
| ENSMUSG00000038838        | valyl-tRNA synthetase 2, mitochondrial (putative) [Source:MGI Symbol;Acc:MGI:1916165]  | 3.6E+07        | 4E+07        | Vars2          |
| ENSMUSG00000001524        | general transcription factor II H, polypeptide 4 [Source:MGI Symbol;Acc:MGI:1338799]   | 3.6E+07        | 4E+07        | Gtf2h4         |
| ENSMUSG00000003534        | discoidin domain receptor family, member 1 [Source:MGI Symbol;Acc:MGI:99216]           | 3.6E+07        | 4E+07        | Ddr1           |
| ENSMUSG00000003541        | immediate early response 3 [Source:MGI Symbol;Acc:MGI:104814]                          | 3.6E+07        | 4E+07        | Ier3           |
| <b>ENSMUSG00000059714</b> | <b>flotillin 1 [Source:MGI Symbol;Acc:MGI:1100500]</b>                                 | <b>3.6E+07</b> | <b>4E+07</b> | <b>Flot1</b>   |
| ENSMUSG00000001525        | tubulin, beta 5 class I [Source:MGI Symbol;Acc:MGI:107812]                             | 3.6E+07        | 4E+07        | Tubb5          |
| ENSMUSG00000061607        | mediator of DNA damage checkpoint 1 [Source:MGI Symbol;Acc:MGI:3525201]                | 3.6E+07        | 4E+07        | Mdc1           |
| ENSMUSG00000059791        | nurim (nuclear envelope membrane protein) [Source:MGI Symbol;Acc:MGI:2146855]          | 3.6E+07        | 4E+07        | Nrm            |
| ENSMUSG00000034595        | protein phosphatase 1, regulatory subunit 18 [Source:MGI Symbol;Acc:MGI:1923698]       | 3.6E+07        | 4E+07        | Ppp1r18        |
| ENSMUSG00000024422        | DEAH (Asp-Glu-Ala-His) box polypeptide 16 [Source:MGI Symbol;Acc:MGI:1916442]          | 3.6E+07        | 4E+07        | Dhx16          |
| ENSMUSG00000050705        | RIKEN cDNA 2310061I04 gene [Source:MGI Symbol;Acc:MGI:1916912]                         | 3.6E+07        | 4E+07        | 2310061I04Rik  |
| ENSMUSG00000024426        | alpha tubulin acetyltransferase 1 [Source:MGI Symbol;Acc:MGI:1913869]                  | 3.6E+07        | 4E+07        | Atat1          |
| ENSMUSG00000024436        | mitochondrial ribosomal protein S18B [Source:MGI Symbol;Acc:MGI:1914223]               | 3.6E+07        | 4E+07        | Mrps18b        |
| ENSMUSG00000039220        | protein phosphatase 1, regulatory subunit 10 [Source:MGI Symbol;Acc:MGI:1289273]       | 3.6E+07        | 4E+07        | Ppp1r10        |
| ENSMUSG00000038762        | ATP-binding cassette, sub-family F (GCN20), member 1 [Source:MGI Symbol;Acc:MGI:135    | 3.6E+07        | 4E+07        | Abcf1          |
| ENSMUSG00000038500        | proline-rich polypeptide 3 [Source:MGI Symbol;Acc:MGI:1922460]                         | 3.6E+07        | 4E+07        | Prr3           |
| ENSMUSG00000024429        | guanine nucleotide binding protein-like 1 [Source:MGI Symbol;Acc:MGI:95764]            | 3.6E+07        | 4E+07        | Gnl1           |
| ENSMUSG00000092604        | predicted gene 20508 [Source:MGI Symbol;Acc:MGI:5141973]                               | 3.6E+07        | 4E+07        | Gm20508        |
| <b>ENSMUSG00000053835</b> | <b>histocompatibility 2, T region locus 24 [Source:MGI Symbol;Acc:MGI:95958]</b>       | <b>3.6E+07</b> | <b>4E+07</b> | <b>H2-T24</b>  |
| ENSMUSG00000092126        | predicted gene, 17579 [Source:MGI Symbol;Acc:MGI:4937213]                              | 3.6E+07        | 4E+07        | Gm17579        |
| <b>ENSMUSG00000067212</b> | <b>histocompatibility 2, T region locus 23 [Source:MGI Symbol;Acc:MGI:95957]</b>       | <b>3.6E+07</b> | <b>4E+07</b> | <b>H2-T23</b>  |
| <b>ENSMUSG00000056116</b> | <b>histocompatibility 2, T region locus 22 [Source:MGI Symbol;Acc:MGI:95956]</b>       | <b>3.6E+07</b> | <b>4E+07</b> | <b>H2-T22</b>  |
| ENSMUSG00000073407        | predicted gene 6034 [Source:MGI Symbol;Acc:MGI:3646212]                                | 3.6E+07        | 4E+07        | Gm6034         |
| <b>ENSMUSG00000079492</b> | <b>predicted gene 11127 [Source:MGI Symbol;Acc:MGI:3779381]</b>                        | <b>3.6E+07</b> | <b>4E+07</b> | <b>Gm11127</b> |
| ENSMUSG00000092277        | predicted gene, 19684 [Source:MGI Symbol;Acc:MGI:5011869]                              | 3.6E+07        | 4E+07        | Gm19684        |
| <b>ENSMUSG00000092243</b> | <b>predicted gene 7030 [Source:MGI Symbol;Acc:MGI:3647514]</b>                         | <b>3.6E+07</b> | <b>4E+07</b> | <b>Gm7030</b>  |
| ENSMUSG00000038311        | RIKEN cDNA 2410017I17 gene [Source:MGI Symbol;Acc:MGI:1916967]                         | 3.6E+07        | 4E+07        | 2410017I17Rik  |
| <b>ENSMUSG00000073402</b> | <b>predicted gene 8909 [Source:MGI Symbol;Acc:MGI:3704134]</b>                         | <b>3.6E+07</b> | <b>4E+07</b> | <b>Gm8909</b>  |

|                           |                                                                                          |                |              |                 |
|---------------------------|------------------------------------------------------------------------------------------|----------------|--------------|-----------------|
| <b>ENSMUSG00000054128</b> | <b>histocompatibility 2, T region locus 3 [Source:MGI Symbol;Acc:MGI:95959]</b>          | <b>3.6E+07</b> | <b>4E+07</b> | <b>H2-T3</b>    |
| ENSMUSG00000024446        | ribonuclease P 21 subunit (human) [Source:MGI Symbol;Acc:MGI:1914926]                    | 3.6E+07        | 4E+07        | Rpp21           |
| ENSMUSG00000045409        | tripartite motif-containing 39 [Source:MGI Symbol;Acc:MGI:1890659]                       | 3.6E+07        | 4E+07        | Trim39          |
| <b>ENSMUSG00000023083</b> | <b>histocompatibility 2, M region locus 10.2 [Source:MGI Symbol;Acc:MGI:1276525]</b>     | <b>3.6E+07</b> | <b>4E+07</b> | <b>H2-M10.2</b> |
| <b>ENSMUSG00000024448</b> | <b>histocompatibility 2, M region locus 10.1 [Source:MGI Symbol;Acc:MGI:1276522]</b>     | <b>3.6E+07</b> | <b>4E+07</b> | <b>H2-M10.1</b> |
| <b>ENSMUSG00000058124</b> | <b>histocompatibility 2, M region locus 10.3 [Source:MGI Symbol;Acc:MGI:1276524]</b>     | <b>3.7E+07</b> | <b>4E+07</b> | <b>H2-M10.3</b> |
| <b>ENSMUSG00000048231</b> | <b>histocompatibility 2, M region locus 10.4 [Source:MGI Symbol;Acc:MGI:1276527]</b>     | <b>3.7E+07</b> | <b>4E+07</b> | <b>H2-M10.4</b> |
| <b>ENSMUSG00000037537</b> | <b>histocompatibility 2, M region locus 11 [Source:MGI Symbol;Acc:MGI:2676637]</b>       | <b>3.7E+07</b> | <b>4E+07</b> | <b>H2-M11</b>   |
| <b>ENSMUSG00000067201</b> | <b>histocompatibility 2, M region locus 9 [Source:MGI Symbol;Acc:MGI:1276570]</b>        | <b>3.7E+07</b> | <b>4E+07</b> | <b>H2-M9</b>    |
| <b>ENSMUSG00000037334</b> | <b>histocompatibility 2, M region locus 1 [Source:MGI Symbol;Acc:MGI:95913]</b>          | <b>3.7E+07</b> | <b>4E+07</b> | <b>H2-M1</b>    |
| <b>ENSMUSG00000037246</b> | <b>histocompatibility 2, M region locus 10.5 [Source:MGI Symbol;Acc:MGI:1276526]</b>     | <b>3.7E+07</b> | <b>4E+07</b> | <b>H2-M10.5</b> |
| <b>ENSMUSG00000037130</b> | <b>histocompatibility 2, M region locus 10.6 [Source:MGI Symbol;Acc:MGI:2687364]</b>     | <b>3.7E+07</b> | <b>4E+07</b> | <b>H2-M10.6</b> |
| <b>ENSMUSG00000024457</b> | <b>tripartite motif-containing 26 [Source:MGI Symbol;Acc:MGI:1337056]</b>                | <b>3.7E+07</b> | <b>4E+07</b> | <b>Trim26</b>   |
| <b>ENSMUSG00000050747</b> | <b>tripartite motif-containing 15 [Source:MGI Symbol;Acc:MGI:1916347]</b>                | <b>3.7E+07</b> | <b>4E+07</b> | <b>Trim15</b>   |
| <b>ENSMUSG00000073400</b> | <b>tripartite motif-containing 10 [Source:MGI Symbol;Acc:MGI:1338757]</b>                | <b>3.7E+07</b> | <b>4E+07</b> | <b>Trim10</b>   |
| ENSMUSG00000073399        | tripartite motif-containing 40 [Source:MGI Symbol;Acc:MGI:2684881]                       | 3.7E+07        | 4E+07        | Trim40          |
| <b>ENSMUSG00000058063</b> | <b>tripartite motif-containing 31 [Source:MGI Symbol;Acc:MGI:2385051]</b>                | <b>3.7E+07</b> | <b>4E+07</b> | <b>Trim31</b>   |
| ENSMUSG00000036492        | ring finger protein 39 [Source:MGI Symbol;Acc:MGI:2156378]                               | 3.7E+07        | 4E+07        | Rnf39           |
| ENSMUSG00000036398        | protein phosphatase 1, regulatory (inhibitor) subunit 11 [Source:MGI Symbol;Acc:MGI:1923 | 3.7E+07        | 4E+07        | Ppp1r11         |
| ENSMUSG00000036315        | zinc ribbon domain containing, 1 [Source:MGI Symbol;Acc:MGI:1913386]                     | 3.7E+07        | 4E+07        | Znrd1           |
| ENSMUSG00000036214        | ZNRD1 antisense RNA [Source:MGI Symbol;Acc:MGI:1923666]                                  | 3.7E+07        | 4E+07        | Znrd1as         |
| ENSMUSG00000064308        | RIKEN cDNA 2410137M14 gene [Source:MGI Symbol;Acc:MGI:1924047]                           | 3.7E+07        | 4E+07        | 2410137M14Rik   |
| <b>ENSMUSG00000024459</b> | <b>histocompatibility 2, M region locus 5 [Source:MGI Symbol;Acc:MGI:95917]</b>          | <b>3.7E+07</b> | <b>4E+07</b> | <b>H2-M5</b>    |
| ENSMUSG00000036036        | zinc finger protein 57 [Source:MGI Symbol;Acc:MGI:99204]                                 | 3.7E+07        | 4E+07        | Zfp57           |
| ENSMUSG00000076439        | myelin oligodendrocyte glycoprotein [Source:MGI Symbol;Acc:MGI:97435]                    | 3.7E+07        | 4E+07        | Mog             |
| ENSMUSG00000024462        | gamma-aminobutyric acid (GABA) B receptor, 1 [Source:MGI Symbol;Acc:MGI:1860139]         | 3.7E+07        | 4E+07        | Gabbr1          |
| ENSMUSG00000056600        | olfactory receptor 90 [Source:MGI Symbol;Acc:MGI:2177473]                                | 3.7E+07        | 4E+07        | Olf90           |
| ENSMUSG00000067192        | olfactory receptor 91 [Source:MGI Symbol;Acc:MGI:2177474]                                | 3.7E+07        | 4E+07        | Olf91           |
| ENSMUSG00000091153        | olfactory receptor 92 [Source:MGI Symbol;Acc:MGI:2177475]                                | 3.7E+07        | 4E+07        | Olf92           |
| ENSMUSG00000091601        | olfactory receptor 93 [Source:MGI Symbol;Acc:MGI:2177476]                                | 3.7E+07        | 4E+07        | Olf93           |
| <b>ENSMUSG00000035186</b> | <b>ubiquitin D [Source:MGI Symbol;Acc:MGI:1344410]</b>                                   | <b>3.7E+07</b> | <b>4E+07</b> | <b>Ubd</b>      |
| ENSMUSG00000043827        | olfactory receptor 94 [Source:MGI Symbol;Acc:MGI:2177477]                                | 3.7E+07        | 4E+07        | Olf94           |
| ENSMUSG00000049561        | olfactory receptor 95 [Source:MGI Symbol;Acc:MGI:2177478]                                | 3.7E+07        | 4E+07        | Olf95           |
| ENSMUSG00000064121        | olfactory receptor 96 [Source:MGI Symbol;Acc:MGI:2177479]                                | 3.7E+07        | 4E+07        | Olf96           |
| ENSMUSG00000058802        | olfactory receptor 97 [Source:MGI Symbol;Acc:MGI:2177480]                                | 3.7E+07        | 4E+07        | Olf97           |
| ENSMUSG00000063660        | olfactory receptor 98 [Source:MGI Symbol;Acc:MGI:2177481]                                | 3.7E+07        | 4E+07        | Olf98           |
| <b>ENSMUSG00000016206</b> | <b>histocompatibility 2, M region locus 3 [Source:MGI Symbol;Acc:MGI:95915]</b>          | <b>3.7E+07</b> | <b>4E+07</b> | <b>H2-M3</b>    |
| ENSMUSG00000061972        | olfactory receptor 99 [Source:MGI Symbol;Acc:MGI:2177482]                                | 3.7E+07        | 4E+07        | Olf99           |
| ENSMUSG00000092077        | olfactory receptor 101 [Source:MGI Symbol;Acc:MGI:2177484]                               | 3.7E+07        | 4E+07        | Olf101          |
| ENSMUSG00000091531        | olfactory receptor 102 [Source:MGI Symbol;Acc:MGI:2177485]                               | 3.7E+07        | 4E+07        | Olf102          |



|                           |                                                                                 |                |              |              |
|---------------------------|---------------------------------------------------------------------------------|----------------|--------------|--------------|
| ENSMUSG00000049618        | olfactory receptor 103 [Source:MGI Symbol;Acc:MGI:2177486]                      | 3.7E+07        | 4E+07        | Olfr103      |
| ENSMUSG00000063188        | olfactory receptor 107 [Source:MGI Symbol;Acc:MGI:2177490]                      | 3.8E+07        | 4E+07        | Olfr107      |
| ENSMUSG00000059687        | olfactory receptor 108 [Source:MGI Symbol;Acc:MGI:2177491]                      | 3.8E+07        | 4E+07        | Olfr108      |
| ENSMUSG00000029184        | olfactory receptor 109 [Source:MGI Symbol;Acc:MGI:2177492]                      | 3.8E+07        | 4E+07        | Olfr109      |
| <b>ENSMUSG00000016283</b> | <b>histocompatibility 2, M region locus 2 [Source:MGI Symbol;Acc:MGI:95914]</b> | <b>3.8E+07</b> | <b>4E+07</b> | <b>H2-M2</b> |
| ENSMUSG00000090894        | olfactory receptor 110 [Source:MGI Symbol;Acc:MGI:2177493]                      | 3.8E+07        | 4E+07        | Olfr110      |
| ENSMUSG00000090675        | olfactory receptor 111 [Source:MGI Symbol;Acc:MGI:2177494]                      | 3.8E+07        | 4E+07        | Olfr111      |
| ENSMUSG00000051611        | olfactory receptor 112 [Source:MGI Symbol;Acc:MGI:2177495]                      | 3.8E+07        | 4E+07        | Olfr112      |
| ENSMUSG00000092292        | olfactory receptor 113 [Source:MGI Symbol;Acc:MGI:2177496]                      | 3.8E+07        | 4E+07        | Olfr113      |
| ENSMUSG00000062629        | olfactory receptor 114 [Source:MGI Symbol;Acc:MGI:2177497]                      | 3.8E+07        | 4E+07        | Olfr114      |
| ENSMUSG00000092413        | olfactory receptor 115 [Source:MGI Symbol;Acc:MGI:2177498]                      | 3.8E+07        | 4E+07        | Olfr115      |
| ENSMUSG00000061336        | olfactory receptor 116 [Source:MGI Symbol;Acc:MGI:2177499]                      | 3.8E+07        | 4E+07        | Olfr116      |
| ENSMUSG00000062337        | olfactory receptor 117 [Source:MGI Symbol;Acc:MGI:2177500]                      | 3.8E+07        | 4E+07        | Olfr117      |
| ENSMUSG00000080990        | olfactory receptor 118 [Source:MGI Symbol;Acc:MGI:2177501]                      | 3.8E+07        | 4E+07        | Olfr118      |
| ENSMUSG00000059964        | olfactory receptor 119 [Source:MGI Symbol;Acc:MGI:2177502]                      | 3.8E+07        | 4E+07        | Olfr119      |
| ENSMUSG00000063994        | olfactory receptor 120 [Source:MGI Symbol;Acc:MGI:2177503]                      | 3.8E+07        | 4E+07        | Olfr120      |
| ENSMUSG00000060017        | olfactory receptor 121 [Source:MGI Symbol;Acc:MGI:2177504]                      | 3.8E+07        | 4E+07        | Olfr121      |
| ENSMUSG00000083947        | olfactory receptor 122 [Source:MGI Symbol;Acc:MGI:2177505]                      | 3.8E+07        | 4E+07        | Olfr122      |
| ENSMUSG00000045202        | olfactory receptor 123 [Source:MGI Symbol;Acc:MGI:2177506]                      | 3.8E+07        | 4E+07        | Olfr123      |
| ENSMUSG00000044985        | olfactory receptor 124 [Source:MGI Symbol;Acc:MGI:2177507]                      | 3.8E+07        | 4E+07        | Olfr124      |
| ENSMUSG00000050613        | olfactory receptor 125 [Source:MGI Symbol;Acc:MGI:2177508]                      | 3.8E+07        | 4E+07        | Olfr125      |
| ENSMUSG00000061777        | olfactory receptor 126 [Source:MGI Symbol;Acc:MGI:2177509]                      | 3.8E+07        | 4E+07        | Olfr126      |
| ENSMUSG00000058114        | olfactory receptor 127 [Source:MGI Symbol;Acc:MGI:2177510]                      | 3.8E+07        | 4E+07        | Olfr127      |
| ENSMUSG00000059030        | olfactory receptor 128 [Source:MGI Symbol;Acc:MGI:2177511]                      | 3.8E+07        | 4E+07        | Olfr128      |
| ENSMUSG00000071084        | olfactory receptor 761 [Source:MGI Symbol;Acc:MGI:3030595]                      | 3.8E+07        | 4E+07        | Olfr761      |
| ENSMUSG00000081724        | olfactory receptor 129 [Source:MGI Symbol;Acc:MGI:2177512]                      | 3.8E+07        | 4E+07        | Olfr129      |
| ENSMUSG00000067187        | olfactory receptor 130 [Source:MGI Symbol;Acc:MGI:2177513]                      | 3.8E+07        | 4E+07        | Olfr130      |
| ENSMUSG00000043312        | olfactory receptor 131 [Source:MGI Symbol;Acc:MGI:2177514]                      | 3.8E+07        | 4E+07        | Olfr131      |
| ENSMUSG00000067186        | olfactory receptor 132 [Source:MGI Symbol;Acc:MGI:2177515]                      | 3.8E+07        | 4E+07        | Olfr132      |
| ENSMUSG00000063240        | olfactory receptor 133 [Source:MGI Symbol;Acc:MGI:2177516]                      | 3.8E+07        | 4E+07        | Olfr133      |
| ENSMUSG00000064153        | olfactory receptor 134 [Source:MGI Symbol;Acc:MGI:2177517]                      | 3.8E+07        | 4E+07        | Olfr134      |
| ENSMUSG00000057801        | olfactory receptor 135 [Source:MGI Symbol;Acc:MGI:2177518]                      | 3.8E+07        | 4E+07        | Olfr135      |
| ENSMUSG00000057443        | olfactory receptor 138 [Source:MGI Symbol;Acc:MGI:2177521]                      | 3.8E+07        | 4E+07        | Olfr138      |
| ENSMUSG00000054940        | olfactory receptor 137 [Source:MGI Symbol;Acc:MGI:2177520]                      | 3.8E+07        | 4E+07        | Olfr137      |
| ENSMUSG00000062695        | olfactory receptor 136 [Source:MGI Symbol;Acc:MGI:2177519]                      | 3.8E+07        | 4E+07        | Olfr136      |
| ENSMUSG00000092322        | predicted gene 20408 [Source:MGI Symbol;Acc:MGI:5141873]                        | 3.9E+07        | 4E+07        | Gm20408      |
| ENSMUSG00000092244        | predicted gene 20410 [Source:MGI Symbol;Acc:MGI:5141875]                        | 3.9E+07        | 4E+07        | Gm20410      |
| ENSMUSG00000092342        | predicted gene 20516 [Source:MGI Symbol;Acc:MGI:5141981]                        | 3.9E+07        | 4E+07        | Gm20516      |
| ENSMUSG00000031233        | phosphoglycerate kinase 2 [Source:MGI Symbol;Acc:MGI:97563]                     | 4E+07          | 4E+07        | Pgk2         |
| ENSMUSG00000025433        | cysteine-rich secretory protein 3 [Source:MGI Symbol;Acc:MGI:102552]            | 4E+07          | 4E+07        | Crisp3       |

|                           |                                                                                                |                |              |                 |
|---------------------------|------------------------------------------------------------------------------------------------|----------------|--------------|-----------------|
| ENSMUSG00000025431        | cysteine-rich secretory protein 1 [Source:MGI Symbol;Acc:MGI:102553]                           | 4E+07          | 4E+07        | Crisp1          |
| ENSMUSG00000090747        | predicted gene, 17495 [Source:MGI Symbol;Acc:MGI:4937129]                                      | 4.1E+07        | 4E+07        | Gm17495         |
| ENSMUSG00000090897        | predicted gene 5494 [Source:MGI Symbol;Acc:MGI:3643294]                                        | 4.1E+07        | 4E+07        | Gm5494          |
| ENSMUSG00000073396        | predicted gene 6084 [Source:MGI Symbol;Acc:MGI:3645915]                                        | 4.1E+07        | 4E+07        | Gm6084          |
| ENSMUSG00000023930        | cysteine-rich secretory protein 2 [Source:MGI Symbol;Acc:MGI:98815]                            | 4.1E+07        | 4E+07        | Crisp2          |
| <b>ENSMUSG00000023926</b> | <b>Rhesus blood group-associated A glycoprotein [Source:MGI Symbol;Acc:MGI:120271</b>          | <b>4.1E+07</b> | <b>4E+07</b> | <b>Rhag</b>     |
| ENSMUSG00000054951        | RIKEN cDNA 9130008F23 gene [Source:MGI Symbol;Acc:MGI:1918833]                                 | 4.1E+07        | 4E+07        | 9130008F23Rik   |
| ENSMUSG00000091043        | glycine-N-acyltransferase-like 3 [Source:MGI Symbol;Acc:MGI:3647683]                           | 4.1E+07        | 4E+07        | Glyat13         |
| ENSMUSG00000023919        | centromere protein Q [Source:MGI Symbol;Acc:MGI:1933744]                                       | 4.1E+07        | 4E+07        | Cenpq           |
| ENSMUSG00000023921        | methylmalonyl-Coenzyme A mutase [Source:MGI Symbol;Acc:MGI:97239]                              | 4.1E+07        | 4E+07        | Mut             |
| ENSMUSG00000042256        | RIKEN cDNA 3110082D06 gene [Source:MGI Symbol;Acc:MGI:1920485]                                 | 4.2E+07        | 4E+07        | 3110082D06Rik   |
| ENSMUSG00000043972        | opsin 5 [Source:MGI Symbol;Acc:MGI:2662912]                                                    | 4.3E+07        | 4E+07        | Opn5            |
| ENSMUSG00000023918        | G protein-coupled receptor 115 [Source:MGI Symbol;Acc:MGI:1925499]                             | 4.3E+07        | 4E+07        | Gpr115          |
| ENSMUSG00000057899        | G protein-coupled receptor 111 [Source:MGI Symbol;Acc:MGI:2182728]                             | 4.3E+07        | 4E+07        | Gpr111          |
| ENSMUSG00000061665        | CD2-associated protein [Source:MGI Symbol;Acc:MGI:1330281]                                     | 4.3E+07        | 4E+07        | Cd2ap           |
| <b>ENSMUSG00000023915</b> | <b>tumor necrosis factor receptor superfamily, member 21 [Source:MGI Symbol;Acc:MG</b>         | <b>4.3E+07</b> | <b>4E+07</b> | <b>Tnfrsf21</b> |
| ENSMUSG00000041293        | G protein-coupled receptor 110 [Source:MGI Symbol;Acc:MGI:1924846]                             | 4.3E+07        | 4E+07        | Gpr110          |
| <b>ENSMUSG00000056492</b> | <b>G protein-coupled receptor 116 [Source:MGI Symbol;Acc:MGI:2182928]</b>                      | <b>4.4E+07</b> | <b>4E+07</b> | <b>Gpr116</b>   |
| ENSMUSG00000023914        | meprin 1 alpha [Source:MGI Symbol;Acc:MGI:96963]                                               | 4.4E+07        | 4E+07        | Mep1a           |
| <b>ENSMUSG00000023913</b> | <b>phospholipase A2, group VII (platelet-activating factor acetylhydrolase, plasma) [Sou</b>   | <b>4.4E+07</b> | <b>4E+07</b> | <b>Pla2g7</b>   |
| ENSMUSG00000040140        | tudor domain containing 6 [Source:MGI Symbol;Acc:MGI:2679727]                                  | 4.4E+07        | 4E+07        | Tdrd6           |
| ENSMUSG00000023912        | solute carrier family 25, member 27 [Source:MGI Symbol;Acc:MGI:1921261]                        | 4.4E+07        | 4E+07        | Slc25a27        |
| ENSMUSG00000023963        | cytochrome P450, family 39, subfamily a, polypeptide 1 [Source:MGI Symbol;Acc:MGI:1927         | 4.4E+07        | 4E+07        | Cyp39a1         |
| ENSMUSG00000039601        | regulator of calcineurin 2 [Source:MGI Symbol;Acc:MGI:1858219]                                 | 4.4E+07        | 4E+07        | Rcan2           |
| ENSMUSG00000023960        | ectonucleotide pyrophosphatase/phosphodiesterase 5 [Source:MGI Symbol;Acc:MGI:19338            | 4.4E+07        | 4E+07        | Enpp5           |
| ENSMUSG00000023961        | ectonucleotide pyrophosphatase/phosphodiesterase 4 [Source:MGI Symbol;Acc:MGI:26826            | 4.4E+07        | 4E+07        | Enpp4           |
| ENSMUSG00000023959        | chloride intracellular channel 5 [Source:MGI Symbol;Acc:MGI:1917912]                           | 4.4E+07        | 4E+07        | Clic5           |
| <b>ENSMUSG00000039153</b> | <b>runx related transcription factor 2 [Source:MGI Symbol;Acc:MGI:99829]</b>                   | <b>4.5E+07</b> | <b>4E+07</b> | <b>Runx2</b>    |
| <b>ENSMUSG00000038954</b> | <b>suppressor of Ty 3 homolog (S. cerevisiae) [Source:MGI Symbol;Acc:MGI:1923723]</b>          | <b>4.5E+07</b> | <b>5E+07</b> | <b>Supt3h</b>   |
| ENSMUSG00000023932        | cell division cycle 5-like (S. pombe) [Source:MGI Symbol;Acc:MGI:1918952]                      | 4.6E+07        | 5E+07        | Cdc5l           |
| ENSMUSG00000023935        | spermatogenesis associated, serine-rich 1 [Source:MGI Symbol;Acc:MGI:1918270]                  | 4.6E+07        | 5E+07        | Spats1          |
| ENSMUSG00000071077        | predicted gene 9104 [Source:MGI Symbol;Acc:MGI:3645365]                                        | 4.6E+07        | 5E+07        | Gm9104          |
| ENSMUSG00000023938        | alanyl-tRNA synthetase 2, mitochondrial (putative) [Source:MGI Symbol;Acc:MGI:2681839]         | 4.6E+07        | 5E+07        | Aars2           |
| ENSMUSG00000023949        | t-complex-associated testis expressed 1 [Source:MGI Symbol;Acc:MGI:98640]                      | 4.6E+07        | 5E+07        | Tcte1           |
| ENSMUSG00000092070        | predicted gene, 17441 [Source:MGI Symbol;Acc:MGI:4937075]                                      | 4.6E+07        | 5E+07        | Gm17441         |
| ENSMUSG00000050405        | transmembrane protein 151B [Source:MGI Symbol;Acc:MGI:2685169]                                 | 4.6E+07        | 5E+07        | Tmem151b        |
| ENSMUSG00000023947        | nuclear factor of kappa light polypeptide gene enhancer in B cells inhibitor, epsilon [Source: | 4.6E+07        | 5E+07        | Nfkbie          |
| ENSMUSG00000037089        | solute carrier family 35, member B2 [Source:MGI Symbol;Acc:MGI:1921086]                        | 4.6E+07        | 5E+07        | Slc35b2         |
| ENSMUSG00000023944        | heat shock protein 90 alpha (cytosolic), class B member 1 [Source:MGI Symbol;Acc:MGI:96        | 4.6E+07        | 5E+07        | Hsp90ab1        |
| ENSMUSG00000023942        | solute carrier family 29 (nucleoside transporters), member 1 [Source:MGI Symbol;Acc:MGI:       | 4.6E+07        | 5E+07        | Slc29a1         |

|                           |                                                                                                      |                |              |               |
|---------------------------|------------------------------------------------------------------------------------------------------|----------------|--------------|---------------|
| ENSMUSG00000079471        | predicted gene 7325 [Source:MGI Symbol;Acc:MGI:3649059]                                              | 4.6E+07        | 5E+07        | Gm7325        |
| ENSMUSG00000058626        | calpain 11 [Source:MGI Symbol;Acc:MGI:1352490]                                                       | 4.6E+07        | 5E+07        | Capn11        |
| ENSMUSG00000036026        | transmembrane protein 63b [Source:MGI Symbol;Acc:MGI:2387609]                                        | 4.6E+07        | 5E+07        | Tmem63b       |
| ENSMUSG00000023939        | mitochondrial ribosomal protein L14 [Source:MGI Symbol;Acc:MGI:1333864]                              | 4.6E+07        | 5E+07        | Mrpl14        |
| <b>ENSMUSG00000023951</b> | <b>vascular endothelial growth factor A [Source:MGI Symbol;Acc:MGI:103178]</b>                       | <b>4.6E+07</b> | <b>5E+07</b> | <b>Vegfa</b>  |
| ENSMUSG00000023967        | mitochondrial ribosomal protein S18A [Source:MGI Symbol;Acc:MGI:1915815]                             | 4.6E+07        | 5E+07        | Mrps18a       |
| ENSMUSG00000023966        | radial spoke head 9 homolog (Chlamydomonas) [Source:MGI Symbol;Acc:MGI:1922814]                      | 4.6E+07        | 5E+07        | Rsph9         |
| ENSMUSG00000034509        | MAD2L1 binding protein [Source:MGI Symbol;Acc:MGI:1913841]                                           | 4.6E+07        | 5E+07        | Mad2l1bp      |
| ENSMUSG00000023952        | GTP binding protein 2 [Source:MGI Symbol;Acc:MGI:1860138]                                            | 4.6E+07        | 5E+07        | Gtpbp2        |
| ENSMUSG00000023953        | polymerase (DNA directed), eta (RAD 30 related) [Source:MGI Symbol;Acc:MGI:1891457]                  | 4.6E+07        | 5E+07        | Polh          |
| ENSMUSG00000067150        | exportin 5 [Source:MGI Symbol;Acc:MGI:1913789]                                                       | 4.6E+07        | 5E+07        | Xpo5          |
| ENSMUSG00000067148        | polymerase (RNA) I polypeptide C [Source:MGI Symbol;Acc:MGI:103288]                                  | 4.6E+07        | 5E+07        | Polr1c        |
| ENSMUSG00000071074        | Yip1 domain family, member 3 [Source:MGI Symbol;Acc:MGI:106280]                                      | 4.6E+07        | 5E+07        | Yipf3         |
| ENSMUSG00000071073        | predicted gene 88 [Source:MGI Symbol;Acc:MGI:2684934]                                                | 4.6E+07        | 5E+07        | Gm88          |
| ENSMUSG00000012296        | tight junction associated protein 1 [Source:MGI Symbol;Acc:MGI:1921344]                              | 4.6E+07        | 5E+07        | Tjap1         |
| ENSMUSG00000047428        | delta-like 2 homolog (Drosophila) [Source:MGI Symbol;Acc:MGI:2146838]                                | 4.6E+07        | 5E+07        | Dlk2          |
| ENSMUSG00000032842        | ATP-binding cassette, sub-family C (CFTR/MRP), member 10 [Source:MGI Symbol;Acc:MGI:1889348]         | 4.6E+07        | 5E+07        | Abcc10        |
| ENSMUSG00000015597        | zinc finger protein 318 [Source:MGI Symbol;Acc:MGI:1889348]                                          | 4.7E+07        | 5E+07        | Zfp318        |
| <b>ENSMUSG00000023968</b> | <b>cysteine-rich protein 3 [Source:MGI Symbol;Acc:MGI:2152434]</b>                                   | <b>4.7E+07</b> | <b>5E+07</b> | <b>Crip3</b>  |
| ENSMUSG00000067144        | solute carrier family 22 (organic anion transporter), member 7 [Source:MGI Symbol;Acc:MGI:1925559]   | 4.7E+07        | 5E+07        | Slc22a7       |
| ENSMUSG00000091742        | predicted gene 5093 [Source:MGI Symbol;Acc:MGI:3644404]                                              | 4.7E+07        | 5E+07        | Gm5093        |
| ENSMUSG00000015599        | tau tubulin kinase 1 [Source:MGI Symbol;Acc:MGI:2147036]                                             | 4.7E+07        | 5E+07        | Ttbk1         |
| ENSMUSG00000040658        | cDNA sequence BC048355 [Source:MGI Symbol;Acc:MGI:3039376]                                           | 4.7E+07        | 5E+07        | BC048355      |
| ENSMUSG00000040327        | cullin 9 [Source:MGI Symbol;Acc:MGI:1925559]                                                         | 4.7E+07        | 5E+07        | Cul9          |
| <b>ENSMUSG00000015605</b> | <b>serum response factor [Source:MGI Symbol;Acc:MGI:106658]</b>                                      | <b>4.7E+07</b> | <b>5E+07</b> | <b>Srf</b>    |
| ENSMUSG00000023972        | PTK7 protein tyrosine kinase 7 [Source:MGI Symbol;Acc:MGI:1918711]                                   | 4.7E+07        | 5E+07        | Ptk7          |
| ENSMUSG00000003546        | kinesin light chain 4 [Source:MGI Symbol;Acc:MGI:1922014]                                            | 4.7E+07        | 5E+07        | Klc4          |
| ENSMUSG00000002767        | mitochondrial ribosomal protein L2 [Source:MGI Symbol;Acc:MGI:1351622]                               | 4.7E+07        | 5E+07        | Mrpl2         |
| ENSMUSG00000038545        | cullin 7 [Source:MGI Symbol;Acc:MGI:1913765]                                                         | 4.7E+07        | 5E+07        | Cul7          |
| ENSMUSG00000023971        | ribosomal RNA processing 36 homolog (S. cerevisiae) [Source:MGI Symbol;Acc:MGI:2385054]              | 4.7E+07        | 5E+07        | Rrp36         |
| ENSMUSG00000063576        | kelch domain containing 3 [Source:MGI Symbol;Acc:MGI:2651568]                                        | 4.7E+07        | 5E+07        | Klhdc3        |
| ENSMUSG00000002768        | male enhanced antigen 1 [Source:MGI Symbol;Acc:MGI:96957]                                            | 4.7E+07        | 5E+07        | Mea1          |
| ENSMUSG00000059409        | protein phosphatase 2, regulatory subunit B (B56), delta isoform [Source:MGI Symbol;Acc:MGI:2385054] | 4.7E+07        | 5E+07        | Ppp2r5d       |
| ENSMUSG00000002763        | peroxisomal biogenesis factor 6 [Source:MGI Symbol;Acc:MGI:1202304]                                  | 4.7E+07        | 5E+07        | Pex6          |
| ENSMUSG00000002769        | glycine N-methyltransferase [Source:MGI Symbol;Acc:MGI:1202304]                                      | 4.7E+07        | 5E+07        | Gnmt          |
| <b>ENSMUSG00000023973</b> | <b>canopy 3 homolog (zebrafish) [Source:MGI Symbol;Acc:MGI:1919279]</b>                              | <b>4.7E+07</b> | <b>5E+07</b> | <b>Cnpy3</b>  |
| ENSMUSG00000062619        | RIKEN cDNA 2310039H08 gene [Source:MGI Symbol;Acc:MGI:1914351]                                       | 4.7E+07        | 5E+07        | 2310039H08Rik |
| ENSMUSG00000063888        | ribosomal protein L7-like 1 [Source:MGI Symbol;Acc:MGI:1913479]                                      | 4.7E+07        | 5E+07        | Rpl7l1        |
| ENSMUSG00000036568        | cDNA sequence BC032203 [Source:MGI Symbol;Acc:MGI:2673855]                                           | 4.7E+07        | 5E+07        | BC032203      |
| ENSMUSG00000073388        | RIKEN cDNA A330017A19 gene [Source:MGI Symbol;Acc:MGI:3045380]                                       | 4.7E+07        | 5E+07        | A330017A19Rik |

|                           |                                                                                            |                |              |               |
|---------------------------|--------------------------------------------------------------------------------------------|----------------|--------------|---------------|
| ENSMUSG00000036430        | tubulin-specific chaperone C [Source:MGI Symbol;Acc:MGI:1919976]                           | 4.7E+07        | 5E+07        | Tbcc          |
| ENSMUSG00000023978        | peripherin 2 [Source:MGI Symbol;Acc:MGI:102791]                                            | 4.7E+07        | 5E+07        | Prph2         |
| ENSMUSG00000023977        | ubiquitin protein ligase E3 component n-recognin 2 [Source:MGI Symbol;Acc:MGI:1861099]     | 4.7E+07        | 5E+07        | Ubr2          |
| ENSMUSG00000091775        | predicted gene 16494 [Source:MGI Symbol;Acc:MGI:3641930]                                   | 4.7E+07        | 5E+07        | Gm16494       |
| ENSMUSG00000062472        | predicted gene 4945 [Source:MGI Symbol;Acc:MGI:3647512]                                    | 4.7E+07        | 5E+07        | Gm4945        |
| ENSMUSG00000064043        | transcriptional regulating factor 1 [Source:MGI Symbol;Acc:MGI:2442086]                    | 4.7E+07        | 5E+07        | Tref1         |
| <b>ENSMUSG00000034729</b> | <b>mitochondrial ribosomal protein S10 [Source:MGI Symbol;Acc:MGI:1928139]</b>             | <b>4.8E+07</b> | <b>5E+07</b> | <b>Mrps10</b> |
| ENSMUSG00000023979        | guanylate cyclase activator 1B [Source:MGI Symbol;Acc:MGI:1194489]                         | 4.8E+07        | 5E+07        | Guca1b        |
| ENSMUSG00000023982        | guanylate cyclase activator 1a (retina) [Source:MGI Symbol;Acc:MGI:102770]                 | 4.8E+07        | 5E+07        | Guca1a        |
| ENSMUSG00000047150        | RIKEN cDNA 1700001C19 gene [Source:MGI Symbol;Acc:MGI:1922712]                             | 4.8E+07        | 5E+07        | 1700001C19Rik |
| ENSMUSG00000034382        | expressed sequence A1661453 [Source:MGI Symbol;Acc:MGI:2146908]                            | 4.8E+07        | 5E+07        | A1661453      |
| ENSMUSG00000023980        | TAF8 RNA polymerase II, TATA box binding protein (TBP)-associated factor q [Source:MGI     | 4.8E+07        | 5E+07        | Taf8          |
| <b>ENSMUSG00000034165</b> | <b>cyclin D3 [Source:MGI Symbol;Acc:MGI:88315]</b>                                         | <b>4.8E+07</b> | <b>5E+07</b> | <b>Ccnd3</b>  |
| ENSMUSG00000023988        | bystin-like [Source:MGI Symbol;Acc:MGI:1858419]                                            | 4.8E+07        | 5E+07        | Bysl          |
| ENSMUSG00000092558        | mediator complex subunit 20 [Source:MGI Symbol;Acc:MGI:1929648]                            | 4.8E+07        | 5E+07        | Med20         |
| ENSMUSG00000023984        | predicted gene 20517 [Source:MGI Symbol;Acc:MGI:5141982]                                   | 4.8E+07        | 5E+07        | Gm20517       |
| ENSMUSG00000090115        | ubiquitin specific peptidase 49 [Source:MGI Symbol;Acc:MGI:2685391]                        | 4.8E+07        | 5E+07        | Usp49         |
| ENSMUSG00000033475        | translocase of outer mitochondrial membrane 6 homolog (yeast) [Source:MGI Symbol;Acc:M     | 4.8E+07        | 5E+07        | Tomm6         |
| ENSMUSG00000079444        | prickle homolog 4 (Drosophila) [Source:MGI Symbol;Acc:MGI:2685785]                         | 4.8E+07        | 5E+07        | Prickle4      |
| ENSMUSG00000023266        | fibroblast growth factor receptor substrate 3 [Source:MGI Symbol;Acc:MGI:2135965]          | 4.8E+07        | 5E+07        | Frs3          |
| <b>ENSMUSG00000023987</b> | <b>progastricsin (pepsinogen C) [Source:MGI Symbol;Acc:MGI:98909]</b>                      | <b>4.8E+07</b> | <b>5E+07</b> | <b>Pgc</b>    |
| <b>ENSMUSG00000023990</b> | <b>transcription factor EB [Source:MGI Symbol;Acc:MGI:103270]</b>                          | <b>4.8E+07</b> | <b>5E+07</b> | <b>Tfeb</b>   |
| ENSMUSG00000032717        | MyoD family inhibitor [Source:MGI Symbol;Acc:MGI:107687]                                   | 4.8E+07        | 5E+07        | Mdfi          |
| ENSMUSG00000023991        | forkhead box P4 [Source:MGI Symbol;Acc:MGI:1921373]                                        | 4.8E+07        | 5E+07        | Foxp4         |
| ENSMUSG00000021545        | RIKEN cDNA 1700067P10 gene [Source:MGI Symbol;Acc:MGI:1915474]                             | 4.8E+07        | 5E+07        | 1700067P10Rik |
| ENSMUSG00000073386        | RIKEN cDNA 9830107B12 gene [Source:MGI Symbol;Acc:MGI:3608415]                             | 4.8E+07        | 5E+07        | 9830107B12Rik |
| ENSMUSG00000043939        | RIKEN cDNA A530064D06 gene [Source:MGI Symbol;Acc:MGI:2443476]                             | 4.8E+07        | 5E+07        | A530064D06Rik |
| <b>ENSMUSG00000042265</b> | <b>triggering receptor expressed on myeloid cells 1 [Source:MGI Symbol;Acc:MGI:19301</b>   | <b>4.8E+07</b> | <b>5E+07</b> | <b>Trem1</b>  |
| <b>ENSMUSG00000041754</b> | <b>triggering receptor expressed on myeloid cells 3 [Source:MGI Symbol;Acc:MGI:19301</b>   | <b>4.8E+07</b> | <b>5E+07</b> | <b>Trem3</b>  |
| <b>ENSMUSG00000051682</b> | <b>triggering receptor expressed on myeloid cells-like 4 [Source:MGI Symbol;Acc:MGI:1</b>  | <b>4.8E+07</b> | <b>5E+07</b> | <b>Trem14</b> |
| <b>ENSMUSG00000071068</b> | <b>triggering receptor expressed on myeloid cells-like 2 [Source:MGI Symbol;Acc:MGI:2</b>  | <b>4.8E+07</b> | <b>5E+07</b> | <b>Trem12</b> |
| ENSMUSG00000043740        | RIKEN cDNA B430306N03 gene [Source:MGI Symbol;Acc:MGI:2443478]                             | 4.8E+07        | 5E+07        | B430306N03Rik |
| <b>ENSMUSG00000023992</b> | <b>triggering receptor expressed on myeloid cells 2 [Source:MGI Symbol;Acc:MGI:19131</b>   | <b>4.8E+07</b> | <b>5E+07</b> | <b>Trem2</b>  |
| <b>ENSMUSG00000023993</b> | <b>triggering receptor expressed on myeloid cells-like 1 [Source:MGI Symbol;Acc:MGI:1</b>  | <b>4.8E+07</b> | <b>5E+07</b> | <b>Trem11</b> |
| ENSMUSG00000023994        | nuclear transcription factor-Y alpha [Source:MGI Symbol;Acc:MGI:97316]                     | 4.9E+07        | 5E+07        | Nfya          |
| ENSMUSG00000040771        | expressed sequence A1314976 [Source:MGI Symbol;Acc:MGI:2146818]                            | 4.9E+07        | 5E+07        | A1314976      |
| ENSMUSG00000040694        | apolipoprotein B mRNA editing enzyme, catalytic polypeptide 2 [Source:MGI Symbol;Acc:M     | 4.9E+07        | 5E+07        | Apobec2       |
| ENSMUSG00000023995        | translocator protein 2 [Source:MGI Symbol;Acc:MGI:1917276]                                 | 4.9E+07        | 5E+07        | Tspo2         |
| ENSMUSG00000043592        | unc-5 homolog C (C. elegans)-like [Source:MGI Symbol;Acc:MGI:1923839]                      | 4.9E+07        | 5E+07        | Unc5cl        |
| ENSMUSG00000040490        | leucine rich repeat and fibronectin type III domain containing 2 [Source:MGI Symbol;Acc:MC | 4.9E+07        | 5E+07        | Lfn2          |

|                           |                                                                                                              |                |              |               |
|---------------------------|--------------------------------------------------------------------------------------------------------------|----------------|--------------|---------------|
| ENSMUSG00000064120        | molybdenum cofactor synthesis 1 [Source:MGI Symbol;Acc:MGI:1928904]                                          | 5E+07          | 5E+07        | Mocs1         |
| ENSMUSG00000040260        | dishevelled associated activator of morphogenesis 2 [Source:MGI Symbol;Acc:MGI:192369]                       | 5E+07          | 5E+07        | Daam2         |
| ENSMUSG00000023999        | kinesin family member 6 [Source:MGI Symbol;Acc:MGI:1098238]                                                  | 5E+07          | 5E+07        | Kif6          |
| <b>ENSMUSG00000039316</b> | <b>raftlin lipid raft linker 1 [Source:MGI Symbol;Acc:MGI:1923688]</b>                                       | <b>5E+07</b>   | <b>5E+07</b> | <b>Rftn1</b>  |
| ENSMUSG00000067103        | cDNA sequence AY702103 [Source:MGI Symbol;Acc:MGI:3525105]                                                   | 5E+07          | 5E+07        | AY702103      |
| ENSMUSG00000010592        | deleted in azoospermia-like [Source:MGI Symbol;Acc:MGI:1342328]                                              | 5E+07          | 5E+07        | Dazl          |
| <b>ENSMUSG00000038910</b> | <b>phospholipase C-like 2 [Source:MGI Symbol;Acc:MGI:1352756]</b>                                            | <b>5.1E+07</b> | <b>5E+07</b> | <b>Plcl2</b>  |
| ENSMUSG00000044645        | predicted gene 7334 [Source:MGI Symbol;Acc:MGI:3647393]                                                      | 5.1E+07        | 5E+07        | Gm7334        |
| ENSMUSG00000023923        | TBC1 domain family, member 5 [Source:MGI Symbol;Acc:MGI:1919488]                                             | 5.1E+07        | 5E+07        | Tbc1d5        |
| <b>ENSMUSG00000023927</b> | <b>special AT-rich sequence binding protein 1 [Source:MGI Symbol;Acc:MGI:105084]</b>                         | <b>5.2E+07</b> | <b>5E+07</b> | <b>Satb1</b>  |
| ENSMUSG00000035580        | potassium voltage-gated channel, subfamily H (eag-related), member 8 [Source:MGI Symbol;Acc:MGI:105926]      | 5.3E+07        | 5E+07        | Kcnh8         |
| ENSMUSG00000023931        | EF hand domain family, member B [Source:MGI Symbol;Acc:MGI:3045296]                                          | 5.4E+07        | 5E+07        | Efhh          |
| ENSMUSG00000017831        | RAB5A, member RAS oncogene family [Source:MGI Symbol;Acc:MGI:105926]                                         | 5.4E+07        | 5E+07        | Rab5a         |
| ENSMUSG00000044957        | RIKEN cDNA 4921523A10 gene [Source:MGI Symbol;Acc:MGI:3612067]                                               | 5.4E+07        | 5E+07        | 4921523A10Rik |
| ENSMUSG00000000708        | K(lysine) acetyltransferase 2B [Source:MGI Symbol;Acc:MGI:1343094]                                           | 5.4E+07        | 5E+07        | Kat2b         |
| ENSMUSG00000023940        | shugoshin-like 1 (S. pombe) [Source:MGI Symbol;Acc:MGI:1919665]                                              | 5.4E+07        | 5E+07        | Sgol1         |
| ENSMUSG00000023122        | sulfotransferase family, cytosolic, 1C, member 2 [Source:MGI Symbol;Acc:MGI:1916333]                         | 5.4E+07        | 5E+07        | Sult1c2       |
| ENSMUSG00000021631        | mitochondrial ribosomal protein S36, pseudogene 1 [Source:MGI Symbol;Acc:MGI:3809201]                        | 5.4E+07        | 5E+07        | Mrps36-ps1    |
| ENSMUSG00000023943        | sulfotransferase family, cytosolic, 1C, member 1 [Source:MGI Symbol;Acc:MGI:102928]                          | 5.4E+07        | 5E+07        | Sult1c1       |
| ENSMUSG00000023945        | solute carrier family 5 (choline transporter), member 7 [Source:MGI Symbol;Acc:MGI:19271]                    | 5.4E+07        | 5E+07        | Slc5a7        |
| ENSMUSG00000090831        | predicted gene, 17474 [Source:MGI Symbol;Acc:MGI:4937108]                                                    | 5.5E+07        | 5E+07        | Gm17474       |
| ENSMUSG00000024172        | beta galactoside alpha 2,6 sialyltransferase 2 [Source:MGI Symbol;Acc:MGI:2445190]                           | 5.6E+07        | 6E+07        | St6gal2       |
| ENSMUSG00000091504        | vomeronal 2, receptor 118 [Source:MGI Symbol;Acc:MGI:3761695]                                                | 5.6E+07        | 6E+07        | Vmn2r118      |
| ENSMUSG00000024174        | protection of telomeres 1B [Source:MGI Symbol;Acc:MGI:1920086]                                               | 5.6E+07        | 6E+07        | Pot1b         |
| ENSMUSG00000032915        | EGF-like module containing, mucin-like, hormone receptor-like sequence 4 [Source:MGI Symbol;Acc:MGI:1345189] | 5.6E+07        | 6E+07        | Emr4          |
| ENSMUSG00000057835        | zinc finger protein 119a [Source:MGI Symbol;Acc:MGI:1345189]                                                 | 5.6E+07        | 6E+07        | Zfp119a       |
| ENSMUSG00000003198        | zinc finger protein 959 [Source:MGI Symbol;Acc:MGI:2385058]                                                  | 5.6E+07        | 6E+07        | Zfp959        |
| ENSMUSG00000059912        | ribosomal protein L21, pseudogene 6 [Source:MGI Symbol;Acc:MGI:3643554]                                      | 5.6E+07        | 6E+07        | Rpl21-ps6     |
| ENSMUSG00000062101        | zinc finger protein 119b [Source:MGI Symbol;Acc:MGI:2385323]                                                 | 5.6E+07        | 6E+07        | Zfp119b       |
| <b>ENSMUSG00000003206</b> | <b>Epstein-Barr virus induced gene 3 [Source:MGI Symbol;Acc:MGI:1354171]</b>                                 | <b>5.6E+07</b> | <b>6E+07</b> | <b>Ebi3</b>   |
| ENSMUSG00000003208        | coiled-coil domain containing 94 [Source:MGI Symbol;Acc:MGI:1920136]                                         | 5.6E+07        | 6E+07        | Ccdc94        |
| ENSMUSG00000039154        | src homology 2 domain-containing transforming protein D [Source:MGI Symbol;Acc:MGI:105926]                   | 5.6E+07        | 6E+07        | Shd           |
| ENSMUSG00000011589        | fibronectin type 3 and SPRY domain-containing protein [Source:MGI Symbol;Acc:MGI:1934]                       | 5.6E+07        | 6E+07        | Fsd1          |
| ENSMUSG00000038781        | signal transducing adaptor family member 2 [Source:MGI Symbol;Acc:MGI:2147039]                               | 5.6E+07        | 6E+07        | Stap2         |
| ENSMUSG00000003199        | MPN domain containing [Source:MGI Symbol;Acc:MGI:1915297]                                                    | 5.6E+07        | 6E+07        | Mpnd          |
| ENSMUSG00000003200        | SH3-domain GRB2-like 1 [Source:MGI Symbol;Acc:MGI:700010]                                                    | 5.6E+07        | 6E+07        | Sh3gl1        |
| ENSMUSG00000002835        | chromatin assembly factor 1, subunit A (p150) [Source:MGI Symbol;Acc:MGI:1351331]                            | 5.6E+07        | 6E+07        | Chaf1a        |
| ENSMUSG00000019578        | UBX domain protein 6 [Source:MGI Symbol;Acc:MGI:1913780]                                                     | 5.6E+07        | 6E+07        | Ubxn6         |
| ENSMUSG00000002833        | hepatoma-derived growth factor, related protein 2 [Source:MGI Symbol;Acc:MGI:1194492]                        | 5.6E+07        | 6E+07        | Hdgrp2        |
| ENSMUSG00000002831        | perilipin 4 [Source:MGI Symbol;Acc:MGI:1929709]                                                              | 5.6E+07        | 6E+07        | Plin4         |

|                           |                                                                                              |                |              |               |
|---------------------------|----------------------------------------------------------------------------------------------|----------------|--------------|---------------|
| ENSMUSG00000011305        | perilipin 5 [Source:MGI Symbol;Acc:MGI:1914218]                                              | 5.6E+07        | 6E+07        | Plin5         |
| ENSMUSG00000037095        | leucine-rich alpha-2-glycoprotein 1 [Source:MGI Symbol;Acc:MGI:1924155]                      | 5.6E+07        | 6E+07        | Lrg1          |
| ENSMUSG00000001227        | sema domain, transmembrane domain (TM), and cytoplasmic domain, (semaphorin) 6B [Sc          | 5.6E+07        | 6E+07        | Sema6b        |
| ENSMUSG00000044469        | tumor necrosis factor, alpha-induced protein 8-like 1 [Source:MGI Symbol;Acc:MGI:191369:     | 5.6E+07        | 6E+07        | Tnfaip8l1     |
| ENSMUSG00000019579        | DNA segment, Chr 17, Wayne State University 104, expressed [Source:MGI Symbol;Acc:M          | 5.6E+07        | 6E+07        | D17Wsu104e    |
| ENSMUSG00000001229        | dipeptidylpeptidase 9 [Source:MGI Symbol;Acc:MGI:2443967]                                    | 5.6E+07        | 6E+07        | Dpp9          |
| ENSMUSG00000043683        | feminization 1 homolog a (C. elegans) [Source:MGI Symbol;Acc:MGI:1335089]                    | 5.6E+07        | 6E+07        | Fem1a         |
| <b>ENSMUSG00000047123</b> | <b>toll-like receptor adaptor molecule 1 [Source:MGI Symbol;Acc:MGI:2147032]</b>             | <b>5.6E+07</b> | <b>6E+07</b> | <b>Ticam1</b> |
| ENSMUSG000000024197       | perilipin 3 [Source:MGI Symbol;Acc:MGI:1914155]                                              | 5.6E+07        | 6E+07        | Plin3         |
| ENSMUSG00000073380        | arrestin domain containing 5 [Source:MGI Symbol;Acc:MGI:1924170]                             | 5.6E+07        | 6E+07        | Arrdc5        |
| ENSMUSG00000001228        | ubiquitin-like, containing PHD and RING finger domains, 1 [Source:MGI Symbol;Acc:MGI:1:      | 5.6E+07        | 6E+07        | Uhrf1         |
| ENSMUSG00000024201        | lysine (K)-specific demethylase 4B [Source:MGI Symbol;Acc:MGI:2442355]                       | 5.6E+07        | 6E+07        | Kdm4b         |
| ENSMUSG00000013236        | protein tyrosine phosphatase, receptor type, S [Source:MGI Symbol;Acc:MGI:97815]             | 5.7E+07        | 6E+07        | Ptprs         |
| ENSMUSG00000044526        | zinc and ring finger 4 [Source:MGI Symbol;Acc:MGI:1341258]                                   | 5.7E+07        | 6E+07        | Znrf4         |
| ENSMUSG00000042625        | scaffold attachment factor B2 [Source:MGI Symbol;Acc:MGI:2146808]                            | 5.7E+07        | 6E+07        | Safb2         |
| ENSMUSG00000071054        | scaffold attachment factor B [Source:MGI Symbol;Acc:MGI:2146974]                             | 5.7E+07        | 6E+07        | Safb          |
| ENSMUSG00000049760        | RIKEN cDNA 2410015M20 gene [Source:MGI Symbol;Acc:MGI:2442174]                               | 5.7E+07        | 6E+07        | 2410015M20Rik |
| ENSMUSG00000057863        | ribosomal protein L36 [Source:MGI Symbol;Acc:MGI:1860603]                                    | 5.7E+07        | 6E+07        | Rpl36         |
| ENSMUSG00000041168        | lon peptidase 1, mitochondrial [Source:MGI Symbol;Acc:MGI:1921392]                           | 5.7E+07        | 6E+07        | Lonp1         |
| ENSMUSG00000040828        | transmembrane protein 146 [Source:MGI Symbol;Acc:MGI:2147030]                                | 5.7E+07        | 6E+07        | Tmem146       |
| ENSMUSG00000002372        | RAN binding protein 3 [Source:MGI Symbol;Acc:MGI:1919060]                                    | 5.7E+07        | 6E+07        | Ranbp3        |
| ENSMUSG00000054723        | vimentin-type intermediate filament associated coiled-coil protein [Source:MGI Symbol;Acc:   | 5.7E+07        | 6E+07        | Vmac          |
| ENSMUSG00000002379        | NADH dehydrogenase (ubiquinone) 1 alpha subcomplex 11 [Source:MGI Symbol;Acc:MGI:            | 5.7E+07        | 6E+07        | Ndufa11       |
| ENSMUSG00000039481        | neurturin [Source:MGI Symbol;Acc:MGI:108417]                                                 | 5.7E+07        | 6E+07        | Nrtn          |
| ENSMUSG00000007603        | dihydrouridine synthase 3-like (S. cerevisiae) [Source:MGI Symbol;Acc:MGI:2147092]           | 5.7E+07        | 6E+07        | Dus3l         |
| ENSMUSG00000090273        | proline rich 22 [Source:MGI Symbol;Acc:MGI:2685392]                                          | 5.7E+07        | 6E+07        | Prr22         |
| ENSMUSG00000024206        | regulatory factor X, 2 (influences HLA class II expression) [Source:MGI Symbol;Acc:MGI:10    | 5.7E+07        | 6E+07        | Rfx2          |
| ENSMUSG00000024207        | acyl-CoA synthetase bubblegum family member 2 [Source:MGI Symbol;Acc:MGI:3587728]            | 5.7E+07        | 6E+07        | Acsbg2        |
| ENSMUSG00000024209        | RIKEN cDNA 1700061G19 gene [Source:MGI Symbol;Acc:MGI:1925875]                               | 5.7E+07        | 6E+07        | 1700061G19Rik |
| ENSMUSG00000024212        | myeloid/lymphoid or mixed-lineage leukemia (trithorax homolog, Drosophila); translocated t   | 5.7E+07        | 6E+07        | Mllt1         |
| ENSMUSG00000045019        | alkaline ceramidase 1 [Source:MGI Symbol;Acc:MGI:2181962]                                    | 5.7E+07        | 6E+07        | Acer1         |
| ENSMUSG00000002660        | caseinolytic peptidase, ATP-dependent, proteolytic subunit homolog (E. coli) [Source:MGI S   | 5.7E+07        | 6E+07        | Clpp          |
| ENSMUSG00000002661        | alkB, alkylation repair homolog 7 (E. coli) [Source:MGI Symbol;Acc:MGI:1913650]              | 5.7E+07        | 6E+07        | Alkbh7        |
| ENSMUSG00000002664        | persephin [Source:MGI Symbol;Acc:MGI:1201684]                                                | 5.7E+07        | 6E+07        | Pspn          |
| ENSMUSG00000002658        | general transcription factor IIF, polypeptide 1 [Source:MGI Symbol;Acc:MGI:1923848]          | 5.7E+07        | 6E+07        | Gtf2f1        |
| ENSMUSG00000007670        | KH-type splicing regulatory protein [Source:MGI Symbol;Acc:MGI:1336214]                      | 5.7E+07        | 6E+07        | Khsrp         |
| ENSMUSG00000011486        | solute carrier family 25, member 41 [Source:MGI Symbol;Acc:MGI:2144215]                      | 5.7E+07        | 6E+07        | Slc25a41      |
| ENSMUSG00000046329        | solute carrier family 25 (mitochondrial carrier; phosphate carrier), member 23 [Source:MGI : | 5.7E+07        | 6E+07        | Slc25a23      |
| ENSMUSG00000044279        | crumbs homolog 3 (Drosophila) [Source:MGI Symbol;Acc:MGI:2670904]                            | 5.7E+07        | 6E+07        | Crb3          |
| ENSMUSG00000002668        | DENN/MADD domain containing 1C [Source:MGI Symbol;Acc:MGI:1918035]                           | 5.7E+07        | 6E+07        | Dennd1c       |

|                           |                                                                                                                               |                |              |                |
|---------------------------|-------------------------------------------------------------------------------------------------------------------------------|----------------|--------------|----------------|
| ENSMUSG00000062591        | tubulin, beta 4A class IVA [Source:MGI Symbol;Acc:MGI:107848]                                                                 | 5.7E+07        | 6E+07        | Tubb4a         |
| ENSMUSG00000079414        | predicted gene 11110 [Source:MGI Symbol;Acc:MGI:3779362]                                                                      | 5.7E+07        | 6E+07        | Gm11110        |
| <b>ENSMUSG00000035678</b> | <b>tumor necrosis factor (ligand) superfamily, member 9 [Source:MGI Symbol;Acc:MGI:1195273]</b>                               | <b>5.7E+07</b> | <b>6E+07</b> | <b>Tnfsf9</b>  |
| <b>ENSMUSG00000019489</b> | <b>CD70 antigen [Source:MGI Symbol;Acc:MGI:1195273]</b>                                                                       | <b>5.7E+07</b> | <b>6E+07</b> | <b>Cd70</b>    |
| <b>ENSMUSG00000005824</b> | <b>tumor necrosis factor (ligand) superfamily, member 14 [Source:MGI Symbol;Acc:MGI:1195273]</b>                              | <b>5.7E+07</b> | <b>6E+07</b> | <b>Tnfsf14</b> |
| <b>ENSMUSG00000024164</b> | <b>complement component 3 [Source:MGI Symbol;Acc:MGI:88227]</b>                                                               | <b>5.7E+07</b> | <b>6E+07</b> | <b>C3</b>      |
| ENSMUSG00000005823        | G protein-coupled receptor 108 [Source:MGI Symbol;Acc:MGI:1925558]                                                            | 5.7E+07        | 6E+07        | Gpr108         |
| ENSMUSG00000019487        | thyroid hormone receptor interactor 10 [Source:MGI Symbol;Acc:MGI:2146901]                                                    | 5.7E+07        | 6E+07        | Trip10         |
| <b>ENSMUSG00000034116</b> | <b>vav 1 oncogene [Source:MGI Symbol;Acc:MGI:98923]</b>                                                                       | <b>5.7E+07</b> | <b>6E+07</b> | <b>Vav1</b>    |
| <b>ENSMUSG00000004730</b> | <b>EGF-like module containing, mucin-like, hormone receptor-like sequence 1 [Source:MGI Symbol;Acc:MGI:1195273]</b>           | <b>5.7E+07</b> | <b>6E+07</b> | <b>Emr1</b>    |
| ENSMUSG00000090655        | vomer nasal 2, receptor 120 [Source:MGI Symbol;Acc:MGI:3644483]                                                               | 5.8E+07        | 6E+07        | Vmn2r120       |
| ENSMUSG00000038048        | contactin associated protein-like 5C [Source:MGI Symbol;Acc:MGI:3646013]                                                      | 5.8E+07        | 6E+07        | Cntnap5c       |
| ENSMUSG00000071052        | ribosomal protein L7A, pseudogene 5 [Source:MGI Symbol;Acc:MGI:3643553]                                                       | 5.8E+07        | 6E+07        | Rpl7a-ps5      |
| ENSMUSG00000024227        | RIKEN cDNA 2610034M16 gene [Source:MGI Symbol;Acc:MGI:1916489]                                                                | 5.9E+07        | 6E+07        | 2610034M16Rik  |
| ENSMUSG00000024228        | nudix (nucleoside diphosphate linked moiety X)-type motif 12 [Source:MGI Symbol;Acc:MGI:107444]                               | 5.9E+07        | 6E+07        | Nudt12         |
| ENSMUSG00000048915        | ephrin A5 [Source:MGI Symbol;Acc:MGI:107444]                                                                                  | 6.3E+07        | 6E+07        | EfnA5          |
| ENSMUSG00000023965        | F-box and leucine-rich repeat protein 17 [Source:MGI Symbol;Acc:MGI:1354704]                                                  | 6.3E+07        | 6E+07        | Fbxl17         |
| ENSMUSG00000045506        | RIKEN cDNA A930002H24 gene [Source:MGI Symbol;Acc:MGI:2443151]                                                                | 6.4E+07        | 6E+07        | A930002H24Rik  |
| <b>ENSMUSG00000000127</b> | <b>fer (fms/fps related) protein kinase [Source:MGI Symbol;Acc:MGI:105917]</b>                                                | <b>6.4E+07</b> | <b>6E+07</b> | <b>Fer</b>     |
| ENSMUSG00000024083        | praja 2, RING-H2 motif containing [Source:MGI Symbol;Acc:MGI:2159342]                                                         | 6.5E+07        | 6E+07        | Pja2           |
| ENSMUSG00000073377        | expressed sequence AU016765 [Source:MGI Symbol;Acc:MGI:3034888]                                                               | 6.5E+07        | 6E+07        | AU016765       |
| ENSMUSG00000024085        | mannosidase 2, alpha 1 [Source:MGI Symbol;Acc:MGI:104669]                                                                     | 6.5E+07        | 7E+07        | Man2a1         |
| ENSMUSG00000024088        | RIKEN cDNA 4930583I09 gene [Source:MGI Symbol;Acc:MGI:1925307]                                                                | 6.5E+07        | 7E+07        | 4930583I09Rik  |
| ENSMUSG00000045036        | transmembrane protein 232 [Source:MGI Symbol;Acc:MGI:2685786]                                                                 | 6.6E+07        | 7E+07        | Tmem232        |
| ENSMUSG00000024091        | vesicle-associated membrane protein, associated protein A [Source:MGI Symbol;Acc:MGI:1916017]                                 | 6.6E+07        | 7E+07        | Vapa           |
| ENSMUSG00000050612        | thioredoxin domain containing 2 (spermatzoa) [Source:MGI Symbol;Acc:MGI:2389312]                                              | 6.6E+07        | 7E+07        | Txndc2         |
| ENSMUSG00000056515        | RAB31, member RAS oncogene family [Source:MGI Symbol;Acc:MGI:1914603]                                                         | 6.6E+07        | 7E+07        | Rab31          |
| ENSMUSG00000061950        | protein phosphatase 4, regulatory subunit 1 [Source:MGI Symbol;Acc:MGI:1917601]                                               | 6.6E+07        | 7E+07        | Ppp4r1         |
| ENSMUSG00000024096        | ralA binding protein 1 [Source:MGI Symbol;Acc:MGI:108466]                                                                     | 6.6E+07        | 7E+07        | Ralbp1         |
| <b>ENSMUSG00000024098</b> | <b>twisted gastrulation homolog 1 (Drosophila) [Source:MGI Symbol;Acc:MGI:2137520]</b>                                        | <b>6.6E+07</b> | <b>7E+07</b> | <b>Twsg1</b>   |
| ENSMUSG00000034647        | ankyrin repeat domain 12 [Source:MGI Symbol;Acc:MGI:1914357]                                                                  | 6.6E+07        | 7E+07        | Ankrd12        |
| ENSMUSG00000024099        | NADH dehydrogenase (ubiquinone) flavoprotein 2 [Source:MGI Symbol;Acc:MGI:1920150]                                            | 6.6E+07        | 7E+07        | Ndufv2         |
| <b>ENSMUSG00000024101</b> | <b>open reading frame 19 [Source:MGI Symbol;Acc:MGI:1916017]</b>                                                              | <b>6.6E+07</b> | <b>7E+07</b> | <b>ORF19</b>   |
| ENSMUSG00000035842        | DEAD/H (Asp-Glu-Ala-Asp/His) box polypeptide 11 (CHL1-like helicase homolog, S. cerevisiae) [Source:MGI Symbol;Acc:MGI:10495] | 6.6E+07        | 7E+07        | Ddx11          |
| ENSMUSG00000073376        | predicted gene 10495 [Source:MGI Symbol;Acc:MGI:3642611]                                                                      | 6.7E+07        | 7E+07        | Gm10495        |
| ENSMUSG00000052105        | RIKEN cDNA 1110012J17 gene [Source:MGI Symbol;Acc:MGI:1915867]                                                                | 6.7E+07        | 7E+07        | 1110012J17Rik  |
| ENSMUSG00000023460        | RAB12, member RAS oncogene family [Source:MGI Symbol;Acc:MGI:894284]                                                          | 6.7E+07        | 7E+07        | Rab12          |
| ENSMUSG00000024105        | RIKEN cDNA 9130404H23 gene [Source:MGI Symbol;Acc:MGI:1921806]                                                                | 6.7E+07        | 7E+07        | 9130404H23Rik  |
| ENSMUSG00000033278        | protein tyrosine phosphatase, receptor type, M [Source:MGI Symbol;Acc:MGI:102694]                                             | 6.7E+07        | 7E+07        | Ptpm           |
| ENSMUSG00000073375        | leucine rich repeat containing 30 [Source:MGI Symbol;Acc:MGI:2685172]                                                         | 6.8E+07        | 7E+07        | Lrrc30         |

|                           |                                                                                          |                |              |               |
|---------------------------|------------------------------------------------------------------------------------------|----------------|--------------|---------------|
| ENSMUSG00000032796        | laminin, alpha 1 [Source:MGI Symbol;Acc:MGI:99892]                                       | 6.8E+07        | 7E+07        | Lama1         |
| ENSMUSG00000024043        | Rho GTPase activating protein 28 [Source:MGI Symbol;Acc:MGI:2147003]                     | 6.8E+07        | 7E+07        | Arhgap28      |
| ENSMUSG00000041565        | l(3)mbt-like 4 (Drosophila) [Source:MGI Symbol;Acc:MGI:2444889]                          | 6.9E+07        | 7E+07        | L3mbtl4       |
| ENSMUSG00000024044        | erythrocyte protein band 4.1-like 3 [Source:MGI Symbol;Acc:MGI:103008]                   | 7E+07          | 7E+07        | Epb4.1l3      |
| ENSMUSG00000049672        | zinc finger protein 161 [Source:MGI Symbol;Acc:MGI:1195345]                              | 7E+07          | 7E+07        | Zfp161        |
| ENSMUSG00000073374        | RIKEN cDNA C030034I22 gene [Source:MGI Symbol;Acc:MGI:1924783]                           | 7E+07          | 7E+07        | C030034I22Rik |
| ENSMUSG00000091636        | RIKEN cDNA A330050F15 gene [Source:MGI Symbol;Acc:MGI:2444600]                           | 7E+07          | 7E+07        | A330050F15Rik |
| ENSMUSG00000003279        | discs, large (Drosophila) homolog-associated protein 1 [Source:MGI Symbol;Acc:MGI:1346]  | 7E+07          | 7E+07        | Dlgap1        |
| ENSMUSG00000047407        | TGFB-induced factor homeobox 1 [Source:MGI Symbol;Acc:MGI:1194497]                       | 7.1E+07        | 7E+07        | Tgif1         |
| ENSMUSG00000066983        | predicted gene, 16519 [Source:MGI Symbol;Acc:MGI:4360871]                                | 7.1E+07        | 7E+07        | Gm16519       |
| ENSMUSG00000034868        | myosin, light chain 12B, regulatory [Source:MGI Symbol;Acc:MGI:107494]                   | 7.1E+07        | 7E+07        | Myl12b        |
| ENSMUSG00000024048        | myosin, light chain 12A, regulatory, non-sarcomeric [Source:MGI Symbol;Acc:MGI:1914518]  | 7.1E+07        | 7E+07        | Myl12a        |
| <b>ENSMUSG00000024049</b> | <b>myomesin 1 [Source:MGI Symbol;Acc:MGI:1341430]</b>                                    | <b>7.1E+07</b> | <b>7E+07</b> | <b>Myom1</b>  |
| ENSMUSG00000024052        | lipin 2 [Source:MGI Symbol;Acc:MGI:1891341]                                              | 7.2E+07        | 7E+07        | Lpin2         |
| ENSMUSG00000024053        | elastin microfibril interfacier 2 [Source:MGI Symbol;Acc:MGI:2389136]                    | 7.2E+07        | 7E+07        | Emilin2       |
| ENSMUSG00000024054        | SMC hinge domain containing 1 [Source:MGI Symbol;Acc:MGI:1921605]                        | 7.2E+07        | 7E+07        | Smchd1        |
| ENSMUSG00000024056        | NDC80 homolog, kinetochore complex component (S. cerevisiae) [Source:MGI Symbol;Acc:     | 7.2E+07        | 7E+07        | Ndc80         |
| ENSMUSG00000052525        | speedy homolog A (Xenopus laevis) [Source:MGI Symbol;Acc:MGI:1918141]                    | 7.2E+07        | 7E+07        | Spdya         |
| ENSMUSG00000041057        | WD repeat domain 43 [Source:MGI Symbol;Acc:MGI:1919765]                                  | 7.2E+07        | 7E+07        | Wdr43         |
| ENSMUSG00000045761        | family with sequence similarity 179, member A [Source:MGI Symbol;Acc:MGI:2443498]        | 7.2E+07        | 7E+07        | Fam179a       |
| ENSMUSG00000044375        | cDNA sequence BC027072 [Source:MGI Symbol;Acc:MGI:2385061]                               | 7.2E+07        | 7E+07        | BC027072      |
| ENSMUSG00000024059        | CAP-GLY domain containing linker protein family, member 4 [Source:MGI Symbol;Acc:MGI:    | 7.2E+07        | 7E+07        | Clip4         |
| ENSMUSG00000055471        | anaplastic lymphoma kinase [Source:MGI Symbol;Acc:MGI:103305]                            | 7.2E+07        | 7E+07        | Alk           |
| ENSMUSG00000039770        | yippee-like 5 (Drosophila) [Source:MGI Symbol;Acc:MGI:1916937]                           | 7.3E+07        | 7E+07        | Ypel5         |
| ENSMUSG00000024063        | limb-bud and heart [Source:MGI Symbol;Acc:MGI:1925139]                                   | 7.3E+07        | 7E+07        | Lbh           |
| ENSMUSG00000054469        | lysocardiolipin acyltransferase 1 [Source:MGI Symbol;Acc:MGI:2684937]                    | 7.3E+07        | 7E+07        | Lclat1        |
| ENSMUSG00000043705        | calpain 13 [Source:MGI Symbol;Acc:MGI:2685789]                                           | 7.4E+07        | 7E+07        | Capn13        |
| ENSMUSG00000024064        | UDP-N-acetyl-alpha-D-galactosamine:polypeptide N-acetylgalactosaminyltransferase 14 [S:  | 7.4E+07        | 7E+07        | Galnt14       |
| ENSMUSG00000024065        | EH-domain containing 3 [Source:MGI Symbol;Acc:MGI:1928900]                               | 7.4E+07        | 7E+07        | Ehd3          |
| ENSMUSG00000024066        | xanthine dehydrogenase [Source:MGI Symbol;Acc:MGI:98973]                                 | 7.4E+07        | 7E+07        | Xdh           |
| ENSMUSG00000038541        | steroid 5 alpha-reductase 2 [Source:MGI Symbol;Acc:MGI:2150380]                          | 7.4E+07        | 7E+07        | Srd5a2        |
| ENSMUSG00000058704        | mediator of cell motility 1 [Source:MGI Symbol;Acc:MGI:1924140]                          | 7.5E+07        | 7E+07        | Memo1         |
| ENSMUSG00000024067        | dpy-30 homolog (C. elegans) [Source:MGI Symbol;Acc:MGI:1913560]                          | 7.5E+07        | 7E+07        | Dpy30         |
| ENSMUSG00000024068        | spastin [Source:MGI Symbol;Acc:MGI:1858896]                                              | 7.5E+07        | 7E+07        | Spast         |
| ENSMUSG00000024069        | solute carrier family 30 (zinc transporter), member 6 [Source:MGI Symbol;Acc:MGI:238674: | 7.5E+07        | 7E+07        | Slc30a6       |
| <b>ENSMUSG00000039193</b> | <b>NLR family, CARD domain containing 4 [Source:MGI Symbol;Acc:MGI:3036243]</b>          | <b>7.5E+07</b> | <b>7E+07</b> | <b>Nlr4</b>   |
| ENSMUSG00000024072        | Yip1 domain family, member 4 [Source:MGI Symbol;Acc:MGI:1915114]                         | 7.5E+07        | 7E+07        | Yipf4         |
| ENSMUSG00000024073        | baculoviral IAP repeat-containing 6 [Source:MGI Symbol;Acc:MGI:1276108]                  | 7.5E+07        | 8E+07        | Birc6         |
| ENSMUSG00000024078        | tetratricopeptide repeat domain 27 [Source:MGI Symbol;Acc:MGI:1921446]                   | 7.5E+07        | 8E+07        | Ttc27         |
| ENSMUSG00000001870        | latent transforming growth factor beta binding protein 1 [Source:MGI Symbol;Acc:MGI:1091 | 7.5E+07        | 8E+07        | Ltbp1         |



|                    |                                                                                  |         |       |         |
|--------------------|----------------------------------------------------------------------------------|---------|-------|---------|
| ENSMUSG00000071042 | RAS, guanyl releasing protein 3 [Source:MGI Symbol;Acc:MGI:3028579]              | 7.6E+07 | 8E+07 | Rasgrp3 |
| ENSMUSG00000002017 | family with sequence similarity 98, member A [Source:MGI Symbol;Acc:MGI:1919972] | 7.6E+07 | 8E+07 | Fam98a  |
